# Supplementary material for: Perception of obesity and overweight among adults living in suburban Nepal: a qualitative study
Source: PubMed Central journal article supplement — BMJ Open. 2021 Apr 29;11(4):e043719. doi: 10.1136/bmjopen-2020-043719 (PMC8094329; doi:10.1136/bmjopen-2020-043719), 2021-04-29
Supplement: bmjopen-2020-043719.draft_revisions.pdf [file bmjopen-2020-043719.draft_revisions.pdf]

# BMJ Open

BMJ Open is committed to open peer review. As part of this commitment we make the peer review history of every article we publish publicly available.

When an article is published we post the peer reviewers' comments and the authors' responses online. We also post the versions of the paper that were used during peer review. These are the versions that the peer review comments apply to.

The versions of the paper that follow are the versions that were submitted during the peer review process. They are not the versions of record or the final published versions. They should not be cited or distributed as the published version of this manuscript.

BMJ Open is an open access journal and the full, final, typeset and author-corrected version of record of the manuscript is available on our site with no access controls, subscription charges or pay-per-view fees (<http://bmjopen.bmj.com>).

If you have any questions on BMJ Open's open peer review process please email [info.bmjopen@bmj.com](mailto:info.bmjopen@bmj.com)

# BMJ Open

## A qualitative study on the perception of obesity in Nepal

|                               |                                                                                                                                                                                                                                                                                                                                                                                                                     |
|-------------------------------|---------------------------------------------------------------------------------------------------------------------------------------------------------------------------------------------------------------------------------------------------------------------------------------------------------------------------------------------------------------------------------------------------------------------|
| Journal:                      | <i>BMJ Open</i>                                                                                                                                                                                                                                                                                                                                                                                                     |
| Manuscript ID                 | bmjopen-2020-043719                                                                                                                                                                                                                                                                                                                                                                                                 |
| Article Type:                 | Original research                                                                                                                                                                                                                                                                                                                                                                                                   |
| Date Submitted by the Author: | 13-Aug-2020                                                                                                                                                                                                                                                                                                                                                                                                         |
| Complete List of Authors:     | Shrestha, Sachita; Dhulikhel Hospital, Department of Community Programs<br>Asthanee, Shanta<br>Karmacharya, Biraj Man; Kathmandu University School of Medical Sciences, Department of Public Health; Dhulikhel Hospital, Department of Community Programs<br>Subedi, Seema; Johns Hopkins University, Department of International Health<br>Koju, Rajendra; Dhulikhel Hospital, Department of Medicine (Cardiology) |
| Keywords:                     | PUBLIC HEALTH, QUALITATIVE RESEARCH, PREVENTIVE MEDICINE, PRIMARY CARE                                                                                                                                                                                                                                                                                                                                              |
|                               |                                                                                                                                                                                                                                                                                                                                                                                                                     |

SCHOLARONE™  
Manuscripts

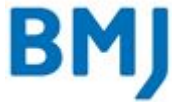

I, the Submitting Author has the right to grant and does grant on behalf of all authors of the Work (as defined in the below author licence), an exclusive licence and/or a non-exclusive licence for contributions from authors who are: i) UK Crown employees; ii) where BMJ has agreed a CC-BY licence shall apply, and/or iii) in accordance with the terms applicable for US Federal Government officers or employees acting as part of their official duties; on a worldwide, perpetual, irrevocable, royalty-free basis to BMJ Publishing Group Ltd ("BMJ") its licensees and where the relevant Journal is co-owned by BMJ to the co-owners of the Journal, to publish the Work in this journal and any other BMJ products and to exploit all rights, as set out in our [licence](#).

The Submitting Author accepts and understands that any supply made under these terms is made by BMJ to the Submitting Author unless you are acting as an employee on behalf of your employer or a postgraduate student of an affiliated institution which is paying any applicable article publishing charge ("APC") for Open Access articles. Where the Submitting Author wishes to make the Work available on an Open Access basis (and intends to pay the relevant APC), the terms of reuse of such Open Access shall be governed by a Creative Commons licence – details of these licences and which [Creative Commons](#) licence will apply to this Work are set out in our licence referred to above.

Other than as permitted in any relevant BMJ Author's Self Archiving Policies, I confirm this Work has not been accepted for publication elsewhere, is not being considered for publication elsewhere and does not duplicate material already published. I confirm all authors consent to publication of this Work and authorise the granting of this licence.

# A qualitative study on the perception of obesity in Nepal

Sachita Shrestha<sup>1</sup>, Shanta Asthane, Biraj Man Karmacharya<sup>1,2</sup>, Seema Subedi<sup>3</sup>, Rajendra Prasad Koju<sup>4</sup>

## Author affiliation

<sup>1</sup> Department of Community Programs, Dhulikhel Hospital-Kathmandu University Hospital, Dhulikhel, Nepal

<sup>2</sup> Department of Public Health, Kathmandu University School of Medical Sciences, Kathmandu, Nepal

<sup>3</sup> Department of International Health, John Hopkins Bloomberg School of Public Health, Baltimore, Maryland, USA

<sup>4</sup> Department of Cardiology, Dhulikhel Hospital-Kathmandu University Hospital, Dhulikhel, Nepal

**Corresponding author:** Sachita Shrestha, Gainesville, Florida. Email: [sachizshrestha@gmail.com](mailto:sachizshrestha@gmail.com). Contact number: 1-352-214-5020.

Word count: 3,932

References: 31

1  
2  
3 35 **Abstract**

4  
5 36 **Objective**

6  
7 37 To explore the perception of obesity and overweight among Nepalese adults living in a  
8  
9 38 suburban community from both community's and health providers' perspectives.

10  
11 39 **Design**

12  
13 40 A qualitative study comprising focus group discussion and in-depth interview.

14  
15  
16 41 **Setting**

17  
18 42 Community and health care facilities in Dhulikhel, Nepal.

19  
20  
21 43 **Participants**

22  
23 44 Four focus group discussions were conducted with general people (n= 22) and four in-depth  
24  
25 45 interviews were conducted with health providers.

26  
27  
28 46 **Results**

29  
30 47 Obesity was a rising problem in this suburban community. People had inadequate knowledge  
31  
32 48 regarding the consequences of obesity, and they perceived overweight as normal, healthy,  
33  
34 49 and attractive. The adults above 40 years of age did not perceive themselves to be  
35  
36 50 overweight/obese. Despite the participant's awareness of the importance of diet control and  
37  
38 51 exercise to prevent obesity, these were not translated into practice. The providers at the  
39  
40 52 peripheral health institutions lacked training and instruments to identify central obesity.

41  
42  
43  
44 53 **Conclusions**

45  
46 54 This study provided insight into the perception of obesity in the community through both  
47  
48 55 community and health providers' perspective. Misconception and inadequate knowledge on  
49  
50 56 obesity among people in this community indicate the need of health education and  
51  
52 57 interventional program to increase health awareness and preventive practices.

53  
54  
55  
56 58 **Keywords:** obesity, overweight, perception, qualitative study, Nepal, public health,  
57  
58 59 cardiovascular disease

## 60 **Strengths and limitations of this study**

- 61 • To our knowledge, this is the first study in Nepal to explore the perception of obesity  
62 among adults in a suburban community in Nepal.
- 63 • The study includes the in-depth view of both community people and health care providers  
64 working at different levels.
- 65 • The study findings may not be generalizable to other population because of small sample  
66 size and limitation to only the Dhulikhel Heart Study participants residing in suburban  
67 area.

## 80 **Background**

81 Obesity is one of the top five causes for cardiovascular mortality and morbidity in the world<sup>1</sup>  
82 causing increased risk of coronary artery disease, diabetes mellitus, hypertension, and kidney  
83 failure.<sup>2</sup> The rate of obesity has increased in many developing nations, including Nepal.<sup>3-5</sup>  
84 About 24.3% of Nepalese adults are obese or overweight.<sup>6</sup>

85 Several demographic, socio-economic and cultural factors contributing to obesity have been  
86 described elsewhere.<sup>7-9</sup> Like other developing countries, Nepal is undergoing epidemiologic  
87 and demographic transition, experiencing significant lifestyle changes.<sup>7-10</sup> Urbanization,  
88 leading to increased number of fast food restaurants, the growing culture of 'eating out', and  
89 availability of lower price food with high calories have contributed to obesity. The 2019  
90 STEP survey reported low physical activity and low vegetables and fruits consumption in  
91 Nepal.<sup>6</sup>

92 Studies have found relationship between obesity and body weight/size perception. Unlike in  
93 developed countries, heavier body is preferred in developing countries like South Africa and  
94 Tanzania.<sup>8 11</sup> In Nepal, traditionally, 'big belly' is considered as a sign of prosperity.<sup>7</sup> This  
95 perceived norm might be facilitating weight gain mainly among high-income individuals and  
96 families. However, with the global epidemiologic transition and technological advancement,  
97 this perception may be changing. It is also important to understand how the individual  
98 perceives their own body size. The individuals who do not see themselves as overweight/  
99 obese are prone to gain weight because of their low risk perception and unwillingness to lose  
100 weight.<sup>8 11 12</sup> On the other hand, females generally have wrong perception of their body  
101 weight as to being too high, and thus are dissatisfied with their bodies compared to males.<sup>13</sup>  
102 To our understanding, there are no qualitative studies conducted to date to understand obesity  
103 perception among people in Nepal. Thus, this study aimed to explore the perception of  
104 obesity among Nepalese adults living in Dhulikhel.

## 105 **METHODS**

### 106 **Study design and setting**

107 This was a qualitative study under a large cohort study, the Dhulikhel Heart Study (DHS),  
108 which is a longitudinal cohort study conducted between November 2013 to February 2015 to  
109 assess the prevalence of cardiovascular diseases and its risk factors among adults of 18 years  
110 and older living in Dhulikhel, a sub-urban town in Nepal.<sup>14</sup>

### 111 **Participants**

112 We conducted a Focus group Discussion (FGD) with the DHS participants. We used  
113 purposeful, maximum variation sampling to include participants from different ages and  
114 gender. We stratified participants into four groups as per gender (male and female) and age  
115 (<40years and  $\geq$ 40years). The separation of gender was necessary because women in  
116 Nepalese culture are usually shy and do not discuss explicitly in presence of men. We  
117 contacted 48 eligible participants via phone or home visit. Of which, 22 participated in the  
118 discussion. Six participants who initially agreed to participate did not show up in the  
119 discussion. The reason for non-participation were busy schedule on the given time and date  
120 and medical illness.

121 For IDIs, we purposefully selected four health providers (HPs) from different healthcare  
122 levels to explore barriers to obesity management. We selected one doctor and a nutritionist  
123 from the tertiary hospital, an in-charge from a primary health care center, and an in-charge  
124 from the urban health care center. All agreed to participate in the study.

### 125 **Data collection**

126 We collected data from October 2016 to December 2016. We developed initial guidelines in  
127 Nepali. The FGD guideline was pilot tested among 6 DHS participants, and the IDI guideline  
128 was pre-tested with a doctor in the tertiary hospital. The guidelines were then reviewed and



1  
2  
3 129 modified accordingly. The findings from the pre-tested FGD and IDI were not included in  
4  
5 130 this analysis. The questions included ‘What do you understand by obesity?’, ‘How do you  
6  
7  
8 131 view overweight and obesity?’, ‘How do you describe your body size’, and ‘What factors  
9  
10 132 affect obesity management?’. FGD participants were offered a light snack for their time and  
11  
12 133 participation.

15 134 All FGDs were moderated by the researcher and assisted by a note taker. The moderator was  
16  
17 135 not from the study community, hence did not know the participants prior to the study. The  
18  
19  
20 136 moderator started each session by briefly explaining the aim of the study and receiving  
21  
22 137 informed consent. The moderator started with open-ended questions and probed further for  
23  
24 138 in-depth information. We conducted FGDs in a private space in a community building. The  
25  
26  
27 139 group size varied from 3 to 7. We measured participants’ height and weight before  
28  
29 140 discussion. The investigator conducted and in-depth interviews with health providers in the  
30  
31 141 private room at their respective health care centers. Informed consent was received prior to  
32  
33  
34 142 each interview.

### 37 143 **Data analysis**

38  
39  
40 144 IDIs and FGDs were recorded and transcribed verbatim in Nepali. SS transcribed all recorded  
41  
42 145 data. We used structural and thematic coding to analyze the data. We started with an “a  
43  
44 146 priori” list of codes drawn from the literature review and then included additional themes that  
45  
46 147 came up during the inductive analysis process. A second coder (SA) used the same start list  
47  
48  
49 148 and inductively coded for emerging themes. Coders discussed similarities and differences in  
50  
51 149 the way codes were applied and agreed on the emerging ones. After the discussion, the  
52  
53 150 codebook was updated. SS further analyzed the transcripts and grouped text units as per the  
54  
55  
56 151 codes using the Atlas ti.7. Selected quotes were reported.

### 58 152 **Patient and public involvement**

153 No patients or the public were involved in the conception of this study, analysis, and  
 154 manuscript writing.

## 155 RESULTS

### 156 Characteristics of participants

157 The characteristics of the participants are presented in tables 1 and 2.

158 **Table 1: Socio-demographic characteristics of FGD participants**

| Characteristics         | Participants (n=22)<br>n (%) |
|-------------------------|------------------------------|
| <b>Age group</b>        |                              |
| 20-39                   | 10 (45.5)                    |
| 40-59                   | 10 (45.5)                    |
| >60                     | 2 (9.0)                      |
| <b>Gender</b>           |                              |
| Male                    | 10 (45.5)                    |
| Female                  | 12 (54.5)                    |
| <b>Ethnicity</b>        |                              |
| Newar                   | 25 (71.4)                    |
| Brahmin                 | 5 (14.3)                     |
| Tamang                  | 4 (11.4)                     |
| <b>Religion</b>         |                              |
| Hindu                   | 22(100.0)                    |
| <b>Marital status</b>   |                              |
| Married                 | 15 (68.2)                    |
| Not married             | 6 (27.3)                     |
| Widow                   | 1 (4.5)                      |
| <b>Education</b>        |                              |
| No formal education     | 3 (13.6)                     |
| Primary level education | 2 (9.1)                      |
| Secondary level         | 6 (27.3)                     |
| High school or more     | 9 (40.9)                     |
| <b>Occupation</b>       |                              |
| Employee                | 3 (13.6)                     |
| Self-employed*          | 9 (40.9)                     |
| Home makers             | 4 (18.2)                     |
| Unemployed              | 2 (9.1)                      |
| Student                 | 4 (18.2)                     |
| <b>BMI</b>              |                              |
| <25kg/m <sup>2</sup>    | 9 (40.9%)                    |
| ≥25-29kg/m <sup>2</sup> | 6 (27.3%)                    |
| ≥30kg/m <sup>2</sup>    | 7 (31.8%)                    |

159 \*Self-employed include business and agriculture

160 **Table 2: Job title and represented institution of health providers**

| Job title               | Institution                       | N |
|-------------------------|-----------------------------------|---|
| Medical Officer         | Tertiary hospital                 | 1 |
| Nutritionist            | Tertiary hospital                 | 1 |
| Auxillary Health Worker | Primary Health Care Center (PHCC) | 1 |
| Auxiliary Health Worker | Urban Health Care Center (UHCC)   | 1 |

161

162 We categorized themes derived from FGDs and IDIs into five categories: (1) Burden of  
 163 obesity; (2) Knowledge on obesity; (3) Attitude towards obesity; (4) Body size perception;  
 164 and (5) Barriers to obesity management. The example of coding, categorizing, and  
 165 formulating themes is given in table 3.

166 **Table 3: Example of coding, categorizing, and formulating themes**

| Codes                       | Definition of codes                                                                                                          | Subcategory    | Category                            | Theme                         |
|-----------------------------|------------------------------------------------------------------------------------------------------------------------------|----------------|-------------------------------------|-------------------------------|
| Busy Schedule               | Any reference to discontinuing or not initiating exercise due to patient's lack of time.                                     | Exercise habit | Challenges in behavior modification | Barriers to weight management |
| Laziness                    | Any reference to discontinuing or not initiating exercise due to patient's laziness.                                         |                |                                     |                               |
| Co-morbidities              | Any reference to discontinuing or not initiating exercise due to patient's existing disease/condition.                       |                |                                     |                               |
| Weather                     | Any reference to discontinuing or not initiating exercise due to weather condition.                                          |                |                                     |                               |
| Lack of physical facilities | Any reference to discontinuing or not initiating exercise due to lack of physical facilities and adequate space to exercise. |                |                                     |                               |
| Food taste                  | Any reference to difficulty in modifying dietary habit due to food taste.                                                    | Food habit     |                                     |                               |

---

|                                      |                                |                                                                                                                 |
|--------------------------------------|--------------------------------|-----------------------------------------------------------------------------------------------------------------|
| 1<br>2<br>3<br>4<br>5<br>6<br>7<br>8 | Desire to eat                  | Any reference to difficulty in modifying dietary habit due to patient's desire to eat what they see.            |
| 9<br>10<br>11<br>12<br>13            | Junk food                      | Any reference to difficulty in modifying dietary habit due to easy availability and accessibility of junk food. |
| 14<br>15<br>16<br>17                 | Lack of access to healthy food | Any reference to difficulty in modifying dietary habit due to inaccessibility of healthy food.                  |

---

167

168 **Burden of obesity**

169 Both FGD participants and HPs identified obesity as a growing problem in the community. A  
 170 medical officer stated that among 20-25 patients he examines in a day, 7-8 of them are either  
 171 overweight or obese. He further commented that obesity might have been increasing in  
 172 teenagers, but these teenagers are not under their radar as they do not usually visit doctors.  
 173 Obesity was found to be higher among females and individual aged 40 years and over in the  
 174 community. Participants also pointed out that obesity is high among few ethnic groups like,  
 175 Newar and Tamang, married persons, office workers, housewives, businessmen, drivers, rich  
 176 people, and people living in urban areas.

177 *“In Newari culture, there is a lot of feasts and festivals, so they eat a lot. In*  
 178 *case of Tamang, they drink (alcohol) a lot. They eat much while drinking.*  
 179 *Both are high in calorie, so this might result in weight gain.” (Nutritionist)*

180

181 **Awareness on obesity**182 Causes of obesity

183 All FGD participants believed that obesity could result from unhealthy diet (e.g., oily and  
 184 fatty food), lack of exercise, and sedentary lifestyles. Few mentioned heredity and old age as  
 185 causes to overweight. Participants aged 40 and over reported they gained weight without any  
 186 specific reasons although they try to maintain their diet.

1  
2  
3 187 *“In my case, I eat chapatti in the evening and rice in the morning. Still my*  
4 188 *belly does not get decreased. In the past, despite my massive eating, I did*  
5 189 *not gain weight. Now, even drinking water, leads to weight gain.”*(Male,  
6 190 *above 40)*

7  
8  
9 191 *“For some, it looks like genetics. Their grandparents are fat and so are the*  
10 192 *grandchildren.”* (Female, above 40)

11  
12 193 Female participants further added the reasons for being obese, such as use of family planning  
13  
14 194 devices, increase in amount of food during childbirth, and habit of eating leftovers to prevent  
15  
16 195 food waste.

17  
18  
19  
20 196 *“(I) was told to eat more during my child birth. Everyone used to say that I*  
21 197 *need more than before. So, the amount of my food increased. I used to eat*  
22 198 *less before (giggles)”* (Female, above 40yrs.)

23  
24 199 *“It’s like, someone leaves the food, and instead of throwing, I feel like*  
25 200 *should eat it. Why to throw (food)? So, I gained weight.”* (Female, above  
26 201 *40yrs.)*

## 28 202 Complicaitons of obesity

29  
30  
31 203 Musculoskeletal problems, such as difficulty sitting and walking, back pain, and pressure on  
32  
33 204 heel due to overweight were the predominant complications reported by participants. Many  
34  
35 205 reported high blood pressures, while few mentioned diabetes, high cholesterol, and heart  
36  
37 206 disease as complications. Participants’ knowledge of complications were not only based on  
38  
39 207 their experience but also what they had seen in their family and community.

40  
41  
42 208 *“As per my experience, it is better to lose weight than to gain it. [...] Once*  
43 209 *I had an experience of being overweight. It was difficult. It’s like I had*  
44 210 *Asthma [disease]. I could not walk.”* (Male, under 40yrs.)

45  
46  
47 211 Some participants also expressed their concern regarding appearance resulting from  
48  
49 212 overweight. A male participant under 40 years stated, he was ashamed of walking with his  
50  
51 213 friends when he was overweight. Another participant said,

52  
53  
54 214 *“Our body shape looks bad. [...] (We) look older in younger age because*  
55 215 *of obesity.* (Male, under 40yrs.)

56  
57  
58 216 HPs commented that people do not take obesity seriously as they do not have adequate  
59  
60 217 knowledge about its complications. As one said:

218 *“Until and unless the disease does not get complicated, it barely comes*  
 219 *to their mind that they should go for check-up. Otherwise, they don’t even*  
 220 *give a try to reduce weight although they are asked to do so.”* (Medical  
 221 Officer)

223 People who feared the health consequences of obesity usually ask the HPs for suggestions  
 224 to reduce weight. However, one health provider emphasized that the reason of being  
 225 concerned is the appearance rather than disease.

226  
 227 *“I see these days that people are concerned with obesity not because of*  
 228 *disease but because of how they look physically. There are very few*  
 229 *who concerns about disease.”* (Medical Officer)

### 231 **Attitude towards obesity and overweight**

232 FGD participants reported that overweight was considered good in the society, both health-  
 233 wise and appearance-wise. Few participants under 40 years also expressed their willingness  
 234 to increase weight. One female participant described how odd it was to have a relatively  
 235 thinner member in the family:

236 *“...we are five daughters-in-law in the family...it looks odd when there is*  
 237 *one thin person in the room...it does not match in the family.”* (Female,  
 238 under 40yrs.)

239 For women, gaining weight after marriage was viewed as good in the society.

240 *“If I lose my weight and visit there [maternal home], they [neighbors]*  
 241 *would say that my husband did not provide me enough to eat [giggles]. If I*  
 242 *go with my increased weight, they will say that my husband loves me.”*  
 243 (Female, under 40yrs.)

244 However, too much weight gain (obesity) was perceived as bad in the community. People’s  
 245 perception/attitude towards obesity has been changing in the community, which is attributed  
 246 to information provided through media (TV, radio) and increasing disease prevalence due to  
 247 obesity in the community.

248 *“...My mother-in-law used to say that if she saw any handsome and healthy*  
 249 *person then she thought that the person belongs to high economic class.*  
 250 *[...] She says it is good. However, nowadays, her view has changed. Now*

251 *she says that it is not good to gain weight, and excess weight results in*  
252 *disease. (Female, under 40yrs.)*

253 Most participants expressed positive attitude towards thinness and expressed their willingness  
254 to lose weight. Those who had already faced problems or are currently facing problems due  
255 to obesity/overweight, both disease-and appearance-wise, did not want to increase their  
256 weight though their family and community commented on them.

257 *“If we, the overweight people, lose weight, we get comments (from others)*  
258 *like- what happened, what disease you suffered from, are you stressed, and*  
259 *all. But we have to take care of our own body though people comment.”*  
260 *(Female, above 40yrs.)*

261 HPs also mentioned about the low self-esteem and psychological stress they found among  
262 obese people, especially in teenagers, because of the comments that people pass onto them.

263 *“It’s like okay if someone [obese individuals] can take it easily when they*  
264 *are called fat [“Mote”]. Otherwise, what I also have seen among teenagers*  
265 *of age 16-17 years is that they do not participate in dance [competitions].*  
266 *They do not participate in game competitions because they think people*  
267 *will stare at them and flatter them. Such cases come often. (Nutritionist)*  
268

269 HPs commented that though excessive weight (obesity) and thinness are considered bad in  
270 the community, overweight is still considered good. This concept is hard to change among  
271 people, even in educated people when it comes to children. The provider described saying,

272 *“(I have seen) a woman with a lean child. She cried after seeing another*  
273 *chubby baby by her side grieving what had happened to her own*  
274 *children. That was a difficult time for me [to counsel her].” (Nutritionist)*  
275

### 276 **Body size perception**

277 Before carrying out the discussion, we measured height and weight of each participant. We  
278 observed that all participants aged 40 and over were found to be either obese or overweight.  
279 Nevertheless, when asked what they feel about the body size, majority of them perceived that  
280 their weight was normal.

281 *“It would be good if I could decrease my belly size. Otherwise, I feel like I*  
282 *am normal.” (Male, under 40yrs.)*



1  
2  
3 283 Majority of the participants under 40 years had normal weight when measured. Two  
4  
5 284 participants, one male and one female, considered themselves as overweight though they  
6  
7  
8 285 were found to be in normal weight.  
9

10 286 Most participants measured their body weight through clothes' size, looking into mirrors, and  
11  
12  
13 287 from others' comment on their body, while only few male participants reported measuring  
14  
15 288 their weight in a scale, when possible. However, HPs commented that the number of people  
16  
17 289 who are aware of/interested in measuring their weight is increasing in the community. As one  
18  
19  
20 290 said,

21  
22  
23 291 *"If we remember those people who measured their weight, the count will be double*  
24 292 *than our patients."* (Auxiliary Health Worker)

## 25 293

### 26 294 **Barriers to weight management**

#### 27 295 Challenges in behavior modification

28  
29  
30 296 All FGD participants mentioned that diet modification and exercise are keys to prevent and  
31  
32  
33 297 control obesity. However, only few of them exercise to maintain/reduce their weight. The  
34  
35  
36 298 major reported barriers were busy schedule and laziness followed by cold weather and lack of  
37  
38  
39 299 space or physical facilities. Participants above 40 years reported comorbidities like  
40  
41  
42 300 musculoskeletal pain limits their physical activities.

43  
44 301 *"I cannot go [for exercise]. Otherwise, I want to walk. It is difficult for me*  
45 302 *to walk, my leg aches".* (Female, above 40yrs.)

46  
47 303 *"I don't have friends to walk together with. Here is no place for Yoga. [...].*  
48 304 *I also need to manage time at home"* (Female, under 40yrs.)

49  
50  
51 305 Two female participants under 40 years reported that they feel normal, and thus do not feel a  
52  
53  
54 306 need to exercise.

55  
56 307 *"We will exercise if we need to. Otherwise, it (the life) is going on. So, I*  
57 308 *feel- why should I exercise?"* (Female, under 40yrs.)  
58  
59  
60



1  
2  
3 309 Participants had diverse opinion on the adequate level of physical activity. Few believed that  
4  
5 310 household chores like cooking and washing clothes are adequate for exercise, while others  
6  
7  
8 311 thought exercise is only adequate when they sweat. The required duration of exercise ranges  
9  
10 312 from 10 minutes to 3 hours a day.

11  
12  
13 313 The frequently reported barrier for diet control was difficulty in changing food habit due to  
14  
15 314 food taste and desire to eat. Participants also mentioned unavailability of healthy food due to  
16  
17 315 use of excessive pesticides in vegetables and fruits. In addition, people's attraction towards  
18  
19 316 junk food because of its easy availability, accessibility, and time saving nature has limited the  
20  
21 317 use of healthy food. One participant complained that people eat junk food to show  
22  
23 318 themselves belonging of higher social status in the community.

24  
25  
26  
27 319 *“If our children walk taking the juice bottles and drinking juices, then that*  
28 320 *reflects a higher status. But, if they walk eating homemade popcorn, then*  
29 321 *that reflects the lower status. (Male, under 40yrs.)*

30  
31  
32 322  
33 323 Lack of HP's knowledge and anthropometric measurement device

34 324  
35 325 HPs usually identify a person with overweight and obesity by measuring their weight and  
36  
37 326 height, by observation, and by patient's own complain. When asked specifically about  
38  
39 327 measuring central obesity, the health providers at the tertiary level stated that they measure  
40  
41 328 waist circumference only for those who are diabetic or have metabolic syndrome. However,  
42  
43 329 the health providers at the peripheral level were not aware of measuring central obesity. One  
44  
45 330  
46 331 put it this way-

47 332  
48 333  
49 334 *“We have not done that (measured central obesity). We do not have*  
50 335 *instrument. We also do not have such information. If we were given*  
51 336 *instrument and the District Health Office directed us to do so or if we*  
52 337 *were given any training...we do everything based on our own knowledge.*  
53 338 *We do not have anything extra.” (Auxiliary Health Worker)*  
54  
55 339

56 340 Lack of counseling

57 341  
58 342 HPs at the peripheral level provide counseling to patients for 7 mins to half an hour  
59  
60 343

1  
2  
3 344 depending upon patient's condition and provider's available time. The Nutritionist spends  
4 345  
5 346 around half an hour to 45 minutes in counseling. However, the medical officer at the tertiary  
6  
7  
8 347 level could provide a maximum of 5 minutes for counseling because of their time constraint  
9  
10 348 and high patient flow in a day. The officer mentioned that it would be helpful if they had a  
11  
12 349 helping hand.

13  
14 350  
15 351 *"Yes, I think it's a time factor [for not counseling patients]. And another, I*  
16 352 *think it is helpful if we get a helping hand. One will take a note when one*  
17 353 *measures [weight], it expedites the process."* (Medical Officer)  
18 354  
19  
20  
21

## 22 355 **Discussion**

23 356 In this study, obesity was perceived as a growing problem in the community. A cross-  
24 357 sectional study (2016) among a cohort of 18 years and older in the same study community  
25  
26 358 reported the prevalence of overweight and obesity as 28.4% and 8.1%, respectively.<sup>9</sup>

27  
28  
29 359 Whereas, the 2019 WHO STEPS survey among 15-45 years Nepalese adults reported the  
30  
31 360 prevalence of overweight and obesity as 20% and 4.3%, respectively.<sup>6</sup>

32  
33 361 Obesity was mainly a problem in those who are 40 years and older, married, office workers,  
34  
35 362 businessman, retired individuals, and housewives. A study among civil servants in Nepal  
36  
37 363 reported that married participants were 7.5 times more likely to be overweight/obese than  
38  
39 364 non-married, and the job title was related with being overweight/obese.<sup>15</sup>

40  
41 365 Participants mainly linked the causes of obesity to personal factors, such as fatty diet and  
42  
43 366 physical inactivity, which is similar to other studies.<sup>8 15-18</sup> Few of our participants reported  
44  
45 367 heredity as a cause of obesity. This is in contrast to the previous study done among civil  
46  
47 368 servants in Nepal, where almost equal number of participants viewed "fatty foods" or "a  
48  
49 369 genetic disorder" as a cause to obesity.<sup>15</sup> In addition to above personal factors, women in our  
50  
51 370 study stressed on social and medical factors (such as use of contraceptives) as reasons to  
52  
53 371 gaining weight. In Nepalese society, higher consumption of food during childbirth is related

1  
2  
3 372 with higher milk production, improved milk quality, and the well-being of both mother and  
4  
5 373 child.

6  
7  
8 374 Health and appearance are the key motive to lose weight.<sup>19 20</sup> Our participants who were  
9  
10 375 concerned about the consequences of obesity and their appearance were more willing to lose  
11  
12 376 or maintain their current weight. However, it is important to consider if people are only  
13  
14 377 concerned with their appearance because the weight loss for a transient period to appear fit  
15  
16 378 and attractive, such as in social events, will not be sustainable, and the attempt to lose  
17  
18 379 massive weight in short duration can be hazardous.

19  
20  
21  
22 380 In our study, almost all participants who were 40 years and older underestimated their body  
23  
24 381 weight, though they all met the criteria of overweight and obese. The finding is similar to the  
25  
26 382 studies conducted in Tanzania,<sup>11</sup> Cameroon<sup>21</sup> and in the United states.<sup>16</sup> Studies have also  
27  
28 383 reported gender variation in the weight estimation,<sup>8 22</sup> men above 40 years are more likely to  
29  
30 384 underestimate their weight than females of that age groups.<sup>21</sup> Interestingly, two overweight  
31  
32 385 male participants who were 40 years and older in our study viewed themselves as  
33  
34 386 underweight. Individuals who do not perceive themselves as overweight and obese are likely  
35  
36 387 to gain more weight due to their low risk perception and unwillingness to lose weight.<sup>8 11 12</sup>

37  
38  
39  
40  
41 388 Big belly is culturally accepted as a sign of prosperity in Nepal.<sup>7 15</sup> Overweight is considered  
42  
43 389 good, healthy, and attractive, which is consistent with other studies.<sup>8 16</sup> Most strikingly, this  
44  
45 390 was frequently reported by women under 40 years of age. Researches have shown that  
46  
47 391 women may be more accepting of obesity than men, thus have less negative attitude towards  
48  
49 392 obese individuals.<sup>23</sup> However, further studies on the role of gender in weight related  
50  
51 393 acceptance is needed.

52  
53  
54  
55 394 Although overweight is acceptable, participants have negative attitude towards obese person,  
56  
57 395 which is congruent with other studies.<sup>8 16 24 25</sup> Obese person is viewed as someone who is

1  
2  
3 396 lazy, heavy, unattractive, and have illness associated with obesity. Studies have shown  
4  
5 397 consequences of others' negative attitudes among obese persons.<sup>8 15 16 24 25</sup> A study in  
6  
7 398 Cameoon reported that the overweight Caucasian and African American women were viewed  
8  
9 399 differently and were discriminated despite their hard work.<sup>16</sup> Such internalized stigma among  
10  
11 400 obese individuals is particularly from the belief that obesity is a result of individual's failure  
12  
13 401 to maintain healthy lifestyle.<sup>24</sup> Considering the fact that participants in our study also pointed  
14  
15 402 out the internal factors, like diet and exercise, as prominent reasons to obesity, it is important  
16  
17 403 to aware people regarding different socio-cultural and medical causes associated with obesity  
18  
19 404 to reduce obesity related stigma and negative attitude.<sup>24</sup> Further study to explore the impact  
20  
21 405 of negative attitude on overweight or obese individuals would be beneficial to develop  
22  
23 406 interventional programs.

24  
25  
26 407 Adequate exercise and healthy diet are keys to manage obesity and other chronic diseases.<sup>26</sup>  
27  
28 408 Even though participants in our study were aware that healthy lifestyle will benefit them, they  
29  
30 409 did not implement it. This difference in knowledge and practice has been described in many  
31  
32 410 studies.<sup>8 27-29</sup>

33  
34 411 As in other low and middle-income countries,<sup>18 24 30</sup> obesity is primarily assessed based on  
35  
36 412 BMI in Nepal. However, BMI cannot differentiate between weight because of excessive  
37  
38 413 muscle percentage and proportions of body fat.<sup>24</sup> Studies have shown that people with normal  
39  
40 414 BMI are at risk of cardiovascular diseases because of Central obesity.<sup>18 24 30</sup> The prevalence  
41  
42 415 of central obesity has been increasing in South Asians. A study in Nepal (2006) reported  
43  
44 416 higher prevalence of central obesity than general obesity among study population in  
45  
46 417 Dharan.<sup>31</sup> Similarly, a study in China reported that the prevalence of central obesity among  
47  
48 418 adults with BMI <25kg/m<sup>2</sup> increased by almost two-fold from 11.9% in 1993 to 21.1% in  
49  
50 419 2009. If the study did not consider measuring WC for obesity, they would have missed 65%

1  
2  
3 420 of the cases.<sup>30</sup> This highlights the importance of measuring WC to accurately predict obesity  
4  
5 421 in the clinical settings.  
6  
7

8 422 This study is one among few qualitative studies of its kind in Nepal that aimed to understand  
9  
10 423 the perception of obesity among adult in a sub-urban community from both community and  
11  
12 424 health provider's perspective. The use of open-ended questions provided insights into  
13  
14 425 participants' views and experiences. However, several limitations exist. This study is  
15  
16 426 confined confined to sub-urban area; therefore, the perception of urban and rural areas is  
17  
18 427 underrepresented. However, qualitative study is intended to understand phenomenon, and not  
19  
20 428 to analyze the relationship between variables.<sup>28 29</sup> Although few number of health providers  
21  
22 429 were interviewed in this study, we have considered to include them from the different health  
23  
24 430 care levels. Given these limitations, however, the study provides profound information on  
25  
26 431 community's perception regarding obesity in Nepal.  
27  
28  
29  
30  
31  
32

### 33 **Conclusions**

34  
35 433 This qualitative study explored the knowledge, attitude, and perception of obesity among  
36  
37 434 Nepalese adults in a sub-urban community. Given the participants' misconception and  
38  
39 435 inadequate knowledge regarding obesity, and the underestimation of their body size, it is  
40  
41 436 suggested to design and disseminate culturally appropriate health information to manage  
42  
43 437 obesity in the community. Our finding shows that the providers at the peripheral health  
44  
45 438 institutions lack training and instrument to measure central obesity. Since the prevalence of  
46  
47 439 central obesity is rising in South Asians, including Nepalese population, it is important to  
48  
49 440 consider central obesity while training health workers at the peripheral level.  
50  
51  
52  
53  
54  
55  
56  
57  
58  
59  
60

1  
2  
3 **443 List of abbreviations**  
4

5 444 BMI: Body Mass Index  
6

7  
8 445 FGD: Focus Group Discussion  
9

10  
11 446 HP: Health Provider  
12

13  
14 447 IDI: In-depth Interview  
15

16  
17 448 STEPS: STEPwise approach to surveillance  
18

19  
20 449 WHO: World Health Organization  
21  
22

23  
24 **450 Declarations**  
25

26 **451 Acknowledgements**  
27

28 452 This study was supported by the grants from the Wide Open Vistas, United States. We  
29  
30 453 acknowledge the support of Dhulikhel Hospital for allowing us to conduct this study. We also  
31  
32 454 thank all participants for providing their invaluable contribution in the study.  
33  
34  
35

36 **455 Author contributions**  
37

38 456 SS, the principal investigator, conceived the study, transcribed and analysed data, and  
39  
40 457 developed the manuscript. BMK contributed to research design. SA contributed to collecting  
41  
42 458 and analysing the data. SS contributed to revising manuscript. All authors read and approved  
43  
44 459 the final manuscript for publication.  
45  
46  
47

48 **460 Funding**  
49

50 461 This work was supported by the Wide Open Vistas [grant number WOV-002].  
51  
52  
53  
54  
55  
56  
57  
58  
59  
60

1  
2  
3 462 **Competing interests**  
4

5 463 None declared  
6  
7

8 464 **Patient consent for publication**  
9

10 465 Not required.  
11  
12

13 466 **Ethics approval**  
14

15 467 Ethical approval was obtained from the Kathmandu University School of Medical Sciences  
16

17 468 Institutional Review Committee (IRB# 36/16). Informed consent was received from all  
18

19 469 participants before participation in the study.  
20  
21  
22

23 470 **Provenance and peer review**  
24

25 471 Not commissioned, externally peer reviewed.  
26  
27  
28  
29

30 472 **Data availability statement**  
31

32 473 No data are available.  
33  
34  
35 474  
36  
37  
38 475  
39  
40  
41 476  
42  
43  
44 477  
45  
46  
47 478  
48  
49  
50 479  
51  
52  
53 480  
54  
55  
56 481  
57  
58  
59 482  
60



483 **References**

- 484 1. World Health Organization. Global health risks : mortality and burden of disease  
485 attributable to selected major risks. Geneva: World Health Organization, 2009.
- 486 2. Zalesin KC, Franklin BA, Miller. WM, et al. Impact of obesity on cardiovascular disease.  
487 *Medical Clinics of North America* 2011;95(5):919-37. doi:  
488 10.1016/j.mcna.2011.06.005
- 489 3. Colditz GA, Willett WC, Stampfer MJ, et al. Weight as a risk factor for clinical diabetes in  
490 women. *American journal of epidemiology* 1990;132(3):501-13.
- 491 4. Colditz GA, Willett WC, Rotnitzky A, et al. Weight gain as a risk factor for clinical  
492 diabetes mellitus in women. *Annals of internal medicine* 1995;122(7):481-86.
- 493 5. Yoon K-H, Lee J-H, Kim J-W, et al. Epidemic obesity and type 2 diabetes in Asia. *The*  
494 *Lancet* 2006;368(9548):1681-88.
- 495 6. Dhimal M, Bista B, Bhattarai S, et al. Report of Non Communicable Disease Risk Factors:  
496 STEPS Survey Nepal 2019. Kathmandu, 2020.
- 497 7. Vaidya A, Shakya S, Krettek A. Obesity prevalence in Nepal: public health challenges in a  
498 low-income nation during an alarming worldwide trend. *Int J Environ Res Public*  
499 *Health* 2010;7(6):2726-44. doi: 10.3390/ijerph7062726
- 500 8. Okop KJ, Mukumbang FC, Mathole T, et al. Perceptions of body size, obesity threat and  
501 the willingness to lose weight among black South African adults: a qualitative study.  
502 *BMC Public Health* 2016;16:365. doi: 10.1186/s12889-016-3028-7 [published Online  
503 First: 2016/04/29]
- 504 9. Shrestha A, Koju RP, Beresford SAA, et al. Reproducibility and relative validity of food  
505 group intake in a food frequency questionnaire developed for Nepalese diet. *Int J*  
506 *Food Sci Nutr* 2017;68(5):605-12. doi: 10.1080/09637486.2016.1268099 [published  
507 Online First: 2017/01/16]
- 508 10. Mishra SR, Neupane D, Bhandari PM, et al. Burgeoning burden of non-communicable  
509 diseases in Nepal: a scoping review. *Global Health* 2015;11(1):32. doi:  
510 10.1186/s12992-015-0119-7
- 511 11. Muhihi AJ, Njelekela MA, Mpembeni R, et al. Obesity, Overweight, and Perceptions  
512 about Body Weight among Middle-Aged Adults in Dar es Salaam, Tanzania. *ISRN*  
513 *Obes* 2012;2012:368520. doi: 10.5402/2012/368520
- 514 12. Awah PK, Kengne AP, Fezeu LL, et al. Perceived risk factors of cardiovascular diseases  
515 and diabetes in Cameroon. *Health Educ Res* 2008;23(4):612-20. doi:  
516 10.1093/her/cym037
- 517 13. Mellor D, Fuller-Tyszkiewicz M, McCabe MP, et al. Body image and self-esteem across  
518 age and gender: A short-term longitudinal study. *Sex roles* 2010;63(9-10):672-81.
- 519 14. Koju RP, Karmacharya BM, Shrestha A, et al. Design of the Dhulikhel Heart Study  
520 (DHS): The epidemiology of emerging cardiovascular disease in Nepal. *Annals of*  
521 *Global Health* 2014;80(3):204-05.
- 522 15. Simkhada P, Poobalan A, Simkhada PP, et al. Knowledge, attitude, and prevalence of  
523 overweight and obesity among civil servants in Nepal. *Asia Pacific Journal of Public*  
524 *Health* 2011;23(4):507-17.
- 525 16. Blixen CE, Singh A, Thacker H. Values and beliefs about obesity and weight reduction  
526 among African American and Caucasian women. *J Transcult Nurs* 2006;17(3):290-7.  
527 doi: 10.1177/1043659606288375
- 528 17. McConnon A, Gribble R, Raats MM, et al. Health professionals', expert patients' and  
529 dieters' beliefs and attitudes about obesity. *J Hum Nutr Diet* 2013;26(6):612-6. doi:  
530 10.1111/jhn.12085



- 1  
2  
3 531 18. Poobalan A, Aucott L. Obesity Among Young Adults in Developing Countries: A  
4 532 Systematic Overview. *Curr Obes Rep* 2016;5(1):2-13. doi: 10.1007/s13679-016-  
5 533 0187-x  
6 534 19. Cheskin LJ, Donze LF. Appearance vs health as motivators for weight loss. *JAMA*  
7 535 2001;286(17):2160-60.  
8 536 20. Teixeira PJ, Silva MN, Mata J, et al. Motivation, self-determination, and long-term  
9 537 weight control. *International Journal of Behavioral Nutrition and Physical Activity*  
10 538 2012;9(1):22.  
11 539 21. Lahmam A, Baali A, Hilali MK, et al. Obesity, overweight and body-weight perception in  
12 540 a High Atlas Moroccan population. *Obes Rev* 2008;9(2):93-9. doi: 10.1111/j.1467-  
13 541 789X.2007.00413.x  
14 542 22. Greener J, Douglas F, van Teijlingen E. More of the same? Conflicting perspectives of  
15 543 obesity causation and intervention amongst overweight people, health professionals  
16 544 and policy makers. *Social science & medicine* 2010;70(7):1042-49.  
17 545 23. Pantenburg B, Sikorski C, Luppá M, et al. Medical students' attitudes towards overweight  
18 546 and obesity. *PLoS One* 2012;7(11):e48113.  
19 547 24. Sikorski C, Riedel C, Luppá M, et al. Perception of overweight and obesity from different  
20 548 angles: a qualitative study. *Scand J Public Health* 2012;40(3):271-7. doi:  
21 549 10.1177/1403494812443604  
22 550 25. Cossrow NH, Jeffery RW, McGuire MT. Understanding weight stigmatization: a focus  
23 551 group study. *J Nutr Educ* 2001;33(4):208-14.  
24 552 26. Ard JD, Svetkey LP. Diet and blood pressure: applying the evidence to clinical practice.  
25 553 *Am Heart J* 2005;149(5):804-12. doi: 10.1016/j.ahj.2005.01.040  
26 554 27. Risso-Gill I, Balabanova D, Majid F, et al. Understanding the modifiable health systems  
27 555 barriers to hypertension management in Malaysia: a multi-method health systems  
28 556 appraisal approach. *BMC Health Serv Res* 2015;15:254. doi: 10.1186/s12913-015-  
29 557 0916-y  
30 558 28. Mothiba T, Malema R, Lekhuleni M. The experiences of the newly diagnosed  
31 559 hypertensive patients admitted into tertiary hospital campus in Limpopo Province,  
32 560 South Africa. *African Journal for Physical, Health Education, Recreation and Dance*  
33 561 (*AJPHRD*) 2013:213-21.  
34 562 29. Shrestha S. Barriers and Facilitators to Treatment among Newly Diagnosed Hypertensive  
35 563 Patients in Nepal: a Qualitative Study. 2016  
36 564 30. Du T, Sun X, Yin P, et al. Increasing trends in central obesity among Chinese adults with  
37 565 normal body mass index, 1993–2009. *BMC public health* 2013;13(1):327.  
38 566 31. Vaidya AK, Pokharel PK, Nagesh S, et al. Association of obesity and physical activity in  
39 567 adult males of Dharan, Nepal. 2006

568

## Standards for Reporting Qualitative Research (SRQR)<sup>a</sup>

| No. | Topic                                                   | Item                                                                                                                                                                                                                                                                                                                                     | Page/<br>line<br>no(s). |
|-----|---------------------------------------------------------|------------------------------------------------------------------------------------------------------------------------------------------------------------------------------------------------------------------------------------------------------------------------------------------------------------------------------------------|-------------------------|
|     | <b>Title and abstract</b>                               |                                                                                                                                                                                                                                                                                                                                          |                         |
| S1  | Title                                                   | Concise description of the nature and topic of the study identifying the study as qualitative or indicating the approach (e.g., ethnography, grounded theory) or data collection methods (e.g., interview, focus group) is recommended                                                                                                   | 1                       |
| S2  | Abstract                                                | Summary of key elements of the study using the abstract format of the intended publication; typically includes objective, methods, results, and conclusions                                                                                                                                                                              | 2                       |
|     | <b>Introduction</b>                                     |                                                                                                                                                                                                                                                                                                                                          |                         |
| S3  | Problem formulation                                     | Description and significance of the problem/phenomenon studied; review of relevant theory and empirical work; problem statement                                                                                                                                                                                                          | 4                       |
| S4  | Purpose or research question                            | Purpose of the study and specific objectives or questions                                                                                                                                                                                                                                                                                | 4                       |
|     | <b>Methods</b>                                          |                                                                                                                                                                                                                                                                                                                                          |                         |
| S5  | Qualitative approach and research paradigm <sup>b</sup> | Qualitative approach (e.g., ethnography, grounded theory, case study, phenomenology, narrative research) and guiding theory if appropriate; identifying the research paradigm (e.g., positivist, constructivist/interpretivist) is also recommended                                                                                      | 5                       |
| S6  | Researcher characteristics and reflexivity              | Researchers' characteristics that may influence the research, including personal attributes, qualifications/experience, relationship with participants, assumptions, or presuppositions; potential or actual interaction between researchers' characteristics and the research questions, approach, methods, results, or transferability | 6                       |
| S7  | Context <sup>b</sup>                                    | Setting/site and salient contextual factors; rationale <sup>a</sup>                                                                                                                                                                                                                                                                      | 5                       |
| S8  | Sampling strategy <sup>b</sup>                          | How and why research participants, documents, or events were selected; criteria for deciding when no further sampling was necessary (e.g., sampling saturation); rationale <sup>a</sup>                                                                                                                                                  | 5                       |
| S9  | Ethical issues pertaining to human subjects             | Documentation of approval by an appropriate ethics review board and participant consent, or explanation for lack thereof; other confidentiality and data security issues                                                                                                                                                                 | 20                      |
| S10 | Data collection methods <sup>b</sup>                    | Types of data collected; details of data collection procedures including (as appropriate) start and stop dates of data collection and analysis, iterative process, triangulation of sources/methods, and modification of procedures in response to evolving study findings; rationale <sup>a</sup>                                       | 5-6                     |
| S11 | Data collection instruments and technologies            | Description of instruments (e.g., interview guides, questionnaires) and devices (e.g., audio recorders) used for data collection; if/how the instrument(s) changed over the course of the study                                                                                                                                          | 5-6                     |

|                         |                                                                                              |                                                                                                                                                                                                                                                                                                       |          |
|-------------------------|----------------------------------------------------------------------------------------------|-------------------------------------------------------------------------------------------------------------------------------------------------------------------------------------------------------------------------------------------------------------------------------------------------------|----------|
| S12                     | Units of study                                                                               | Number and relevant characteristics of participants, documents, or events included in the study; level of participation (could be reported in results)                                                                                                                                                | 5-6, 7-8 |
| S13                     | Data processing                                                                              | Methods for processing data prior to and during analysis, including transcription, data entry, data management and security, verification of data integrity, data coding, and anonymization/deidentification of excerpts                                                                              | 6        |
| S14                     | Data analysis <sup>b</sup>                                                                   | Process by which inferences, themes, etc., were identified and developed, including researchers involved in data analysis; usually references a specific paradigm or approach; rationale <sup>a</sup>                                                                                                 | 6,8-9    |
| S15                     | Techniques to enhance trustworthiness <sup>b</sup>                                           | Techniques to enhance trustworthiness and credibility of data analysis (e.g., member checking, audit trail, triangulation); rationale <sup>a</sup>                                                                                                                                                    | 6        |
| <b>Results/Findings</b> |                                                                                              |                                                                                                                                                                                                                                                                                                       |          |
| S16                     | Synthesis and interpretation                                                                 | Main findings (e.g., interpretations, inferences, and themes); might include development of a theory or model, or integration with prior research or theory                                                                                                                                           | 7-15     |
| S17                     | Links to empirical data                                                                      | Evidence (e.g., quotes, field notes, text excerpts, photographs) to substantiate analytic findings                                                                                                                                                                                                    | 9-15     |
| <b>Discussion</b>       |                                                                                              |                                                                                                                                                                                                                                                                                                       |          |
| S18                     | Integration with prior work, implications, transferability, and contribution(s) to the field | Short summary of main findings; explanation of how findings and conclusions connect to, support, elaborate on, or challenge conclusions of earlier scholarship; discussion of scope of application/generalizability; identification of unique contribution(s) to scholarship in a discipline or field | 15-18    |
| S19                     | Limitations                                                                                  | Trustworthiness and limitations of findings                                                                                                                                                                                                                                                           | 18       |
| <b>Other</b>            |                                                                                              |                                                                                                                                                                                                                                                                                                       |          |
| S20                     | Conflicts of interest                                                                        | Potential sources of influence or perceived influence on study conduct and conclusions; how these were managed                                                                                                                                                                                        | 20       |
| S21                     | Funding                                                                                      | Sources of funding and other support; role of funders in data collection, interpretation, and reporting                                                                                                                                                                                               | 19       |

<sup>a</sup>The authors created the SRQR by searching the literature to identify guidelines, reporting standards, and critical appraisal criteria for qualitative research; reviewing the reference lists of retrieved sources; and contacting experts to gain feedback. The SRQR aims to improve the transparency of all aspects of qualitative research by providing clear standards for reporting qualitative research.

<sup>b</sup>The rationale should briefly discuss the justification for choosing that theory, approach, method, or technique rather than other options available, the assumptions and limitations implicit in those choices, and how those choices influence study conclusions and transferability. As appropriate, the rationale for several items might be discussed together.

Reference: O'Brien BC, Harris IB, Beckman TJ, Reed DA, Cook DA. Standards for reporting qualitative research: a synthesis of recommendations. *Academic Medicine*, Vol. 89, No. 9 / Sept 2014 DOI: 10.1097/ACM.0000000000000388

# BMJ Open

## Perception of obesity and overweight among adults living in suburban Nepal: A qualitative study

|                                 |                                                                                                                                                                                                                                                                                                                                                                                                                                                                      |
|---------------------------------|----------------------------------------------------------------------------------------------------------------------------------------------------------------------------------------------------------------------------------------------------------------------------------------------------------------------------------------------------------------------------------------------------------------------------------------------------------------------|
| Journal:                        | <i>BMJ Open</i>                                                                                                                                                                                                                                                                                                                                                                                                                                                      |
| Manuscript ID                   | bmjopen-2020-043719.R1                                                                                                                                                                                                                                                                                                                                                                                                                                               |
| Article Type:                   | Original research                                                                                                                                                                                                                                                                                                                                                                                                                                                    |
| Date Submitted by the Author:   | 01-Dec-2020                                                                                                                                                                                                                                                                                                                                                                                                                                                          |
| Complete List of Authors:       | Shrestha, Sachita; Dhulikhel Hospital, Department of Community Programmes<br>Asthanee, Shanta; Dhulikhel Hospital, Department of Community Programmes<br>Karmacharya, Biraj Man; Kathmandu University School of Medical Sciences, Department of Public Health; Dhulikhel Hospital, Department of Community Programmes<br>Subedi, Seema; Johns Hopkins University, Department of International Health<br>Kaju, Rajendra; Dhulikhel Hospital, Department of Cardiology |
| <b>Primary Subject Heading</b>: | Public health                                                                                                                                                                                                                                                                                                                                                                                                                                                        |
| Secondary Subject Heading:      | Qualitative research, Cardiovascular medicine, Diabetes and endocrinology, Nutrition and metabolism                                                                                                                                                                                                                                                                                                                                                                  |
| Keywords:                       | PUBLIC HEALTH, QUALITATIVE RESEARCH, PREVENTIVE MEDICINE, PRIMARY CARE                                                                                                                                                                                                                                                                                                                                                                                               |
|                                 |                                                                                                                                                                                                                                                                                                                                                                                                                                                                      |

SCHOLARONE™  
Manuscripts



I, the Submitting Author has the right to grant and does grant on behalf of all authors of the Work (as defined in the below author licence), an exclusive licence and/or a non-exclusive licence for contributions from authors who are: i) UK Crown employees; ii) where BMJ has agreed a CC-BY licence shall apply, and/or iii) in accordance with the terms applicable for US Federal Government officers or employees acting as part of their official duties; on a worldwide, perpetual, irrevocable, royalty-free basis to BMJ Publishing Group Ltd ("BMJ") its licensees and where the relevant Journal is co-owned by BMJ to the co-owners of the Journal, to publish the Work in this journal and any other BMJ products and to exploit all rights, as set out in our [licence](#).

The Submitting Author accepts and understands that any supply made under these terms is made by BMJ to the Submitting Author unless you are acting as an employee on behalf of your employer or a postgraduate student of an affiliated institution which is paying any applicable article publishing charge ("APC") for Open Access articles. Where the Submitting Author wishes to make the Work available on an Open Access basis (and intends to pay the relevant APC), the terms of reuse of such Open Access shall be governed by a Creative Commons licence – details of these licences and which [Creative Commons](#) licence will apply to this Work are set out in our licence referred to above.

Other than as permitted in any relevant BMJ Author's Self Archiving Policies, I confirm this Work has not been accepted for publication elsewhere, is not being considered for publication elsewhere and does not duplicate material already published. I confirm all authors consent to publication of this Work and authorise the granting of this licence.

1  
2  
3  
4  
5 1 **Perception of obesity and overweight among adults living in suburban**  
6 2 **Nepal: A qualitative study**

8 3 Sachita Shrestha<sup>1</sup>, Shanta Asthanee<sup>1</sup>, Biraj Man Karmacharya<sup>1,2</sup>, Seema Subedi<sup>3</sup>, Rajendra  
9 4 Koju<sup>4</sup>

11 5 **Author affiliation**

13  
14 6 <sup>1</sup> Department of Community Programmes, Dhulikhel Hospital-Kathmandu University  
15 7 Hospital, Dhulikhel, Nepal

16 8 <sup>2</sup> Department of Public Health, Kathmandu University School of Medical Sciences,  
17 9 Kathmandu, Nepal

18 10 <sup>3</sup> Department of International Health, John Hopkins Bloomberg School of Public Health,  
19 11 Baltimore, Maryland, USA

20 12 <sup>4</sup> Department of Cardiology, Dhulikhel Hospital-Kathmandu University Hospital, Dhulikhel,  
21 13 Nepal

22 14  
23 15 **Corresponding author:** Sachita Shrestha, Gainesville, Florida. Email:  
24 16 [sachizshrestha@gmail.com](mailto:sachizshrestha@gmail.com). Contact number: 1-352-214-5020.

25 17  
26 18 Word count: 5,069

27 19 References: 37  
28  
29  
30  
31  
32  
33  
34  
35  
36  
37  
38  
39  
40  
41  
42  
43  
44  
45  
46  
47  
48  
49  
50  
51  
52  
53  
54  
55  
56  
57  
58  
59  
60

1  
2  
3 36 **Abstract**

4  
5 37 **Objective**

6  
7 38 To explore the perception of obesity and overweight among Nepalese adults living in a  
8  
9 39 suburban community.

10  
11 40 **Design**

12  
13 41 A qualitative study comprising focus group discussion and in-depth interview.

14  
15  
16 42 **Setting**

17  
18 43 Community and health care facilities in Dhulikhel, Nepal.

19  
20  
21 44 **Participants**

22  
23 45 Four focus group discussions were conducted with community members (n= 22) and four in-  
24  
25 46 depth interviews were conducted with healthcare providers.

26  
27  
28 47 **Results**

29  
30 48 Obesity was a rising problem in this suburban community. Participants had inadequate  
31  
32 49 knowledge regarding the consequences of obesity, and they perceived overweight as normal,  
33  
34 50 healthy, and attractive. The participants above 40 years of age did not perceive themselves to  
35  
36 51 be overweight or obese. Despite participants' awareness of the importance of diet control  
37  
38 52 and exercise to prevent obesity, these were not translated into practice.

39  
40  
41  
42 53 **Conclusions**

43  
44 54 This study provided insight into perceptions of obesity in a suburban Dhulikhel community  
45  
46 55 through both community members' and healthcare providers' perspective. Misconceptions  
47  
48 56 and inadequate knowledge of obesity among people in this community indicate the need for  
49  
50 57 health education and interventional programme to increase health awareness and preventive  
51  
52 58 practices.

53  
54  
55  
56 59 **Keywords:** obesity, overweight, perception, qualitative study, Nepal, public health,  
57  
58 60 cardiovascular disease

## 61 **Strengths and limitations of this study**

- 62 • To our knowledge, this is the first qualitative study in Nepal to explore the perception of  
63 obesity among adults in a suburban community in Nepal.
- 64 • The study includes in-depth views of both community members and health care providers  
65 working at different levels.
- 66 • The study is limited to the Dhulikhel Heart Study participants residing in a suburban area;  
67 therefore, the findings of the study may not be transferable to rural or urban areas.



## 81 **Background**

82 Obesity is one of the top five causes of cardiovascular mortality and morbidity globally<sup>1</sup>  
83 causing an increased risk of coronary artery disease, diabetes mellitus, hypertension, and  
84 kidney failure.<sup>2</sup> The rate of obesity has increased in many developing nations, including in  
85 Nepal.<sup>3-5</sup> About 24.3% of Nepalese adults are obese or overweight.<sup>6</sup>

86 Several demographic, socio-economic, and cultural factors contributing to obesity have been  
87 described elsewhere.<sup>7-9</sup> Like other developing countries, Nepal is undergoing epidemiologic  
88 and demographic transition, experiencing significant lifestyle changes.<sup>7-10</sup> Urbanization,  
89 leading to an increased number of fast-food restaurants, the growing culture of 'eating out',  
90 and the availability of lower-priced, higher caloric food have contributed to obesity. The  
91 2019 WHO STEP survey reported low physical activity and low vegetable and fruit  
92 consumption in Nepal.<sup>6</sup>

93 Studies have found a relationship between obesity and body weight/size perception. Unlike in  
94 developed countries, a heavier body is preferred in many developing countries, such as South  
95 Africa and Tanzania.<sup>8 11</sup> In Nepal, traditionally, having a 'big belly' is considered a sign of  
96 prosperity.<sup>7</sup> This perceived norm might be facilitating weight gain, particularly among high-  
97 income individuals and families. However, with epidemiologic transitions and technological  
98 advancements occurring globally, this perception may be changing. It is also important to  
99 understand how the individual perceives their body size. The individuals who do not see  
100 themselves as overweight/ obese are prone to gain weight because of their low-risk  
101 perception and unwillingness to lose weight.<sup>8 11 12</sup> On the other hand, females generally  
102 misperceive body weight, deeming it higher than it is, and thus are dissatisfied with their  
103 bodies compared to males.<sup>13</sup>

104 In 2015, the Dhulikhel Heart Study, a population-based cohort study on cardiovascular  
105 disease and its risk factors, was conducted among adults living in Dhulikhel, a suburban town

1  
2  
3 106 in Nepal.<sup>14</sup> The study found a high prevalence of cardiovascular disease and its risk factors,  
4  
5 107 such as obesity. Given the high prevalence of obesity and poor cardiovascular health literacy,  
6  
7 108 the development of effective health education and interventional programmes to manage  
8  
9 109 obesity in this community is vital. Though studies regarding obesity perception have been  
10  
11 110 conducted in many low- and middle-income countries (LMICs)<sup>8 15-17</sup>, information on body  
12  
13 111 size self-perception and willingness to lose weight among Nepalese adults is limited. In 2009,  
14  
15 112 Simkhada et.al<sup>18</sup> conducted a cross-sectional study to assess knowledge, attitude, and  
16  
17 113 prevalence of overweight and obesity among civil servants in Nepal. Few qualitative studies  
18  
19 114 that have been conducted in this context focus primarily on diet and exercise.<sup>19 20</sup> To our  
20  
21 115 understanding, there are no qualitative studies conducted to date exploring body size  
22  
23 116 perception and willingness to lose weight among adults in Nepal. Also, no studies exist to  
24  
25 117 understand obesity from the healthcare provider's perspective in Nepal. Our study aims to  
26  
27 118 fulfill the above-mentioned gaps in knowledge by exploring the perception of obesity and  
28  
29 119 overweight among Nepalese adults, including both community members and healthcare  
30  
31 120 providers (HCP).  
32  
33  
34  
35  
36  
37  
38

## 121 **METHODS**

### 122 **Study design and setting**

123 This was a qualitative study under a large cohort study, the Dhulikhel Heart Study (DHS),  
124 which is a longitudinal cohort study conducted between November 2013 and February 2015  
125 to assess the prevalence of cardiovascular diseases and its risk factors among adults of 18  
126 years and older living in Dhulikhel, a sub-urban town in Nepal.<sup>14</sup>

### 127 **Participants**

128 We conducted four focus group discussions (FGD) with 22 DHS participants. We used FGDs  
129 for community members as this method is proven to adequately gather information on the

1  
2  
3 130 perception of obesity among adults in LMICs.<sup>8 15</sup> Participants were selected using purposeful  
4  
5 131 sampling methods. A list of DHS participants was obtained and stratified into four groups by  
6  
7 132 gender (male and female) and age (<40years and  $\geq$ 40years). The separation of gender was  
8  
9 133 necessary because women in Nepalese culture are usually shy and do not discuss explicitly in  
10  
11 134 presence of men. The researcher contacted 12 eligible participants from each group via phone  
12  
13 135 call to request participation in the study. Participants who provided verbal consent were  
14  
15 136 invited for discussions. Of the total 48 eligible participants who agreed to participate, 22 took  
16  
17 137 part in the group discussions. Six participants who initially agreed to participate did not  
18  
19 138 attend the discussion. The reasons for non-participation were busy schedules on the given  
20  
21 139 time and date and medical illness.

22  
23  
24  
25  
26  
27 140 For the in-depth interview (IDI), we purposefully selected four health providers (HPs) from  
28  
29 141 different healthcare levels to explore barriers to obesity management. We selected one doctor  
30  
31 142 and a nutritionist from the tertiary hospital, an in-charge from a primary health care center,  
32  
33 143 and an in-charge from an urban health care center. All HCPs who were invited agreed to  
34  
35 144 participate in the study and were interviewed.

### 36 145 **Data collection**

37  
38  
39  
40  
41  
42 146 We collected data from October 2016 to December 2016. We developed initial guidelines in  
43  
44 147 Nepali. The FGD guideline was pilot tested among 6 DHS participants, and the IDI guideline  
45  
46 148 was pre-tested with a doctor in the tertiary hospital. The guidelines were then reviewed and  
47  
48 149 modified accordingly. The findings from the pre-tested FGD and IDI were not included in  
49  
50 150 this analysis.

51  
52  
53  
54 151 All FGDs were moderated by the researcher and assisted by a note-taker. The moderator was  
55  
56 152 not from the study community and, hence had no prior knowledge about the participants  
57  
58 153 before the study. The moderator started each session by briefly explaining the aim of the  
59  
60

1  
2  
3 154 study and receiving informed consent. Participants' height and weight were also measured  
4  
5 155 before the discussion commenced. The moderator started the discussion with open-ended  
6  
7 156 questions and probed further for in-depth information. The FGD guideline included 10-item  
8  
9 157 questions under four topics— body size perception; knowledge on obesity; attitude towards  
10  
11 158 obesity; and barriers to weight management. For the perception of body size, we asked  
12  
13 159 participants' views on their body size, and then probed why they think their body is normal or  
14  
15 160 overweight or obese and how they measure their body size. To explore participants'  
16  
17 161 knowledge of obesity, we asked questions on the perceived cause and complications of  
18  
19 162 obesity and further probed if certain groups in the community are perceived as more obese  
20  
21 163 than others. On attitude towards obesity, we asked the following questions, 'How do you  
22  
23 164 view overweight and obesity?', and 'What influences society's views on obesity?' Regarding  
24  
25 165 the willingness to lose weight or maintain optimally, we asked about the perceived barriers to  
26  
27 166 weight management. We conducted FGDs in a private space at a community building. The  
28  
29 167 group size varied from 3 to 7. FGD participants were offered a light snack for their time and  
30  
31 168 participation.

32  
33  
34  
35  
36  
37  
38 169 The investigator (SA) conducted IDIs with HCPs in the private room at their respective  
39  
40 170 health care centers. Informed consent was received before each interview. The IDIs were  
41  
42 171 conducted to understand the burden of obesity in the community, providers' perspectives on  
43  
44 172 the community's knowledge and attitude on obesity, and providers' related barriers to obesity  
45  
46 173 management. The questions included 'What percentage of patients attending to your  
47  
48 174 institution are overweight or obese?', 'In general, how well do you think patients understand  
49  
50 175 overweight and obesity?', 'How do community members view/perceive obesity?', 'Are there  
51  
52 176 any common misconceptions in the community about obesity?', and 'What factors affect  
53  
54 177 obesity management?' The moderator further probed on the above questions to explore  
55  
56 178 further information.  
57  
58  
59  
60

## 179 **Data analysis**

180 FGDs and IDIs were recorded and transcribed verbatim in Nepali. SS transcribed all recorded  
181 data. Data were analysed using the hybrid thematic analysis approach.<sup>21</sup> We started with an  
182 “a priori” list of codes drawn from the literature review and research questions and included  
183 additional codes that emerged during the inductive analysis process.<sup>22</sup> One FGD and two  
184 interview transcripts were coded separately by two independent coders (SS and SA) to  
185 enhance the data validity. Coders discussed similarities and differences in the way codes were  
186 applied and agreed on the emerging codes. The interconnected codes were then grouped into  
187 sub-groups and sub-groups were further grouped into broad themes. After the discussion, the  
188 final codebook was updated. SS further analysed the transcripts and grouped text units as per  
189 the codes using the Atlas ti.7. Selected quotes were reported.

## 190 **Ethics statement**

191 All participants who gave verbal consent to participate in the study also signed an informed  
192 consent form. Participation in the study was voluntary. All collected data were kept safe and  
193 strictly confidential.

## 194 **Patient and public involvement**

195 The study design and objectives were informed by previous findings from the DHS study,  
196 which indicated the high prevalence of obesity and poor cardiovascular health literacy among  
197 the community members. Although we did not specifically do separate community  
198 engagement for this study, we did include the discussions in the planning of the DHS in  
199 several community activities at schools, wards, meetings with female community health  
200 volunteers, and other local community clubs.

1  
2  
3 201 **RESULTS**

4  
5 202 **Characteristics of participants**

6  
7 203 The characteristics of the FGD participants are presented in table 1.

8  
9  
10 204 **Table 1: Socio-demographic characteristics of FGD participants**

| Characteristics         | Participants (n=22)<br>n (%) |
|-------------------------|------------------------------|
| <b>Age group</b>        |                              |
| 20-39                   | 10 (45.5)                    |
| 40-59                   | 10 (45.5)                    |
| >60                     | 2 (9.0)                      |
| <b>Gender</b>           |                              |
| Male                    | 10 (45.5)                    |
| Female                  | 12 (54.5)                    |
| <b>Ethnicity</b>        |                              |
| Newar                   | 25 (71.4)                    |
| Brahmin                 | 5 (14.3)                     |
| Tamang                  | 4 (11.4)                     |
| <b>Marital status</b>   |                              |
| Married                 | 15 (68.2)                    |
| Not married             | 6 (27.3)                     |
| Widow                   | 1 (4.5)                      |
| <b>Education</b>        |                              |
| No formal education     | 3 (13.6)                     |
| Primary level education | 2 (9.1)                      |
| Secondary level         | 6 (27.3)                     |
| High school or more     | 9 (40.9)                     |
| <b>Occupation</b>       |                              |
| Employed                | 3 (13.6)                     |
| Self-employed*          | 9 (40.9)                     |
| Homemakers              | 4 (18.2)                     |
| Unemployed              | 2 (9.1)                      |
| Student                 | 4 (18.2)                     |
| <b>BMI</b>              |                              |
| <25kg/m <sup>2</sup>    | 9 (40.9%)                    |
| ≥25-29kg/m <sup>2</sup> | 6 (27.3%)                    |
| ≥30kg/m <sup>2</sup>    | 7 (31.8%)                    |

11  
12  
13  
14  
15  
16  
17  
18  
19  
20  
21  
22  
23  
24  
25  
26  
27  
28  
29  
30  
31  
32  
33  
34  
35  
36  
37  
38  
39  
40  
41  
42  
43  
44  
45  
46  
47  
48  
49  
50 205 \*Self-employed includes business and agriculture

51  
52 206 We categorized themes derived from FGDs and IDIs into five categories: (1) Burden of  
53  
54 207 obesity; (2) Knowledge of obesity; (3) Attitude towards obesity; (4) Body size perception;  
55  
56 208 and, (5) Barriers to obesity management. The example of coding, categorizing, and  
57  
58  
59 209 formulating themes is given in table 2.  
60

210

**Table 2: Example of coding, categorizing, and formulating themes**

| <b>Codes</b>                   | <b>Definition of codes</b>                                                                                                      | <b>Sub-category</b> | <b>Category</b>                     | <b>Theme</b>                  |
|--------------------------------|---------------------------------------------------------------------------------------------------------------------------------|---------------------|-------------------------------------|-------------------------------|
| Busy Schedule                  | Any reference to discontinuing or not initiating exercise due to the patient's lack of time.                                    | Exercise habit      | Challenges in behavior modification | Barriers to weight management |
| Laziness                       | Any reference to discontinuing or not initiating exercise due to the patient's laziness.                                        |                     |                                     |                               |
| Co-morbidities                 | Any reference to discontinuing or not initiating exercise due to the patient's existing disease/condition.                      |                     |                                     |                               |
| Weather                        | Any reference to discontinuing or not initiating exercise due to weather conditions.                                            |                     |                                     |                               |
| Lack of physical facilities    | Any reference to discontinuing or not initiating exercise due to lack of physical facilities and/or adequate space to exercise. |                     |                                     |                               |
| Food taste                     | Any reference to the difficulty in modifying dietary habits due to food taste.                                                  | Food habit          |                                     |                               |
| Desire to eat                  | Any reference to the difficulty in modifying dietary habits due to the patient's desire to eat what they see.                   |                     |                                     |                               |
| Junk food                      | Any reference to the difficulty in modifying dietary habits due to easy availability and accessibility of junk food.            |                     |                                     |                               |
| Lack of access to healthy food | Any reference to the difficulty in modifying dietary habits due to the inaccessibility of healthy food.                         |                     |                                     |                               |

211

## 212 **Burden of obesity**

213 Both FGD participants and HCPs identified obesity as a growing problem in the community.

214 A medical officer stated that among the 20-25 patients he examines in a day, 7-8 of them are

215 either overweight or obese. He further commented that while obesity might be increasing

216 among teenagers, these teenagers are not under their radar as they seldom visit doctors.

217 Obesity was found to be higher among females and individuals aged 40 years and over in the

218 community. Participants also pointed out that obesity is high among particular ethnic groups,

219 such as Newar and Tamang, and among other sub-groups such as married persons, office

220 workers, housewives, businessmen, drivers, rich people, and people living in urban areas.

221 *“In Newari culture, there are a lot of feasts and festivals, so they eat a lot.*

222 *In the case of Tamang, they drink (alcohol) a lot. They eat much while*

223 *drinking. Both are high in calories, so this might result in weight gain.”*

224 (Nutritionist)

225

## 226 **Awareness of obesity**

### 227 Causes of obesity

228 All FGD participants believed that obesity could result from an unhealthy diet (e.g., oily and

229 fatty food), lack of exercise, and sedentary lifestyles. Few mentioned heredity or old age as

230 causes of overweight. Participants aged 40 and over reported they gained weight without any

231 specific reasons while maintaining their diet.

232 *“In my case, I eat chapatti in the evening and rice in the morning. Still, my*

233 *belly does not get decreased. In the past, despite my massive eating, I did*

234 *not gain weight. Now, even drinking water leads to weight gain.”*(Male,

235 above 40)

236 *“For some, it looks like genetics. Their grandparents are fat and so are the*

237 *grandchildren.”* (Female, above 40)

238 Female participants further added the reasons for being obese, such as the use of family

239 planning devices, an increase in food intake after childbirth, and the habit of eating leftovers

240 to prevent food waste.



1  
2  
3 241 *“(I) was told to eat more during my childbirth. Everyone used to say that I*  
4 242 *need more than before. So, the amount of my food increased. I used to eat*  
5 243 *less before (giggles)” (Female, above 40yrs.)*

7  
8 244 *“It’s like, someone leaves the food, and instead of throwing, I feel like [I]*  
9 245 *should eat it. Why throw (food)? So, I gained weight.” (Female, above*  
10 246 *40yrs.)*

## 12 247 Complications of obesity

14 248 Musculoskeletal problems, such as difficulty sitting and walking, back pain, and pressure on  
15  
16 249 the heel due to overweight were the predominant complications reported by participants.

18  
19 250 Many also reported high blood pressures, while few mentioned diabetes, high cholesterol,  
20  
21 251 and heart disease as complications. Participants’ knowledge of complications was not only  
22  
23 252 based on their experience but also on what they had seen in their family and community.

25  
26 253 Participants who had overweight were more concerned about complications, in terms of both  
27  
28 254 their health and appearance, than those with a normal weight. Male participants under the age  
29  
30 255 of 40 years were more concerned about their health and appearance due to overweight. One  
31  
32 256 overweight male participant under 40 years stated he was ashamed of walking with his  
33  
34 257 friends, and added:

37  
38 258 *“As per my experience, it is better to lose weight than to gain it. [...] Once*  
39 259 *I had an experience of being overweight. It was difficult. It’s like I had*  
40 260 *Asthma [disease]. I could not walk.” (Male, under 40yrs.)*

42 261 *“Our body shape looks bad. [...] (We) look older at a younger age because*  
43 262 *of obesity. (Male, under 40yrs.)*

45  
46 263 HCPs, however, commented that people do not take obesity seriously because they lack  
47  
48 264 adequate knowledge about its complications. Once HCP said:

50 265 *“Until and unless the disease does not get complicated, it barely comes*  
51 266 *to their mind that they should go for a check-up. Otherwise, they don’t*  
52 267 *even give a try to reduce weight although they are asked to do so.”*  
53 268 *(Medical Officer)*

54 268  
55 269  
56  
57  
58  
59  
60

1  
2  
3 270 Participants who feared the health consequences of obesity usually ask the HPs for  
4  
5 271 suggestions to reduce weight. However, one HCP emphasized that the reason for being  
6  
7 272 concerned is the appearance rather than disease.

9 273  
10 274 *“I see these days that people are concerned with obesity not because of*  
11 275 *disease but because of how they look physically. There are very few*  
12 276 *who [are] concerned about disease.” (Medical Officer)*  
13 277

### 14 278 **Attitude towards obesity and overweight**

15  
16  
17 279 FGD participants reported that overweight was considered good in society, both health-wise  
18  
19 280 and appearance-wise. Some participants under 40 years also expressed their willingness to  
20  
21 281 increase weight. One female participant described how odd it was to have a thin figure in her  
22  
23 282 family:

24  
25  
26  
27 283 *“...we are five daughters-in-law in the family...it looks odd when there is*  
28 284 *one thin person in the room...it does not match in the family.” (Female,*  
29 285 *under 40yrs.)*

30  
31 286 For women, gaining weight after marriage was viewed positively.

32  
33  
34  
35 287 *“If I lose my weight and visit there [maternal home], they [neighbors]*  
36 288 *would say that my husband did not provide me enough to eat [giggles]. If I*  
37 289 *go with my increased weight, they will say that my husband loves me.”*  
38 290 *(Female, under 40yrs.)*

39  
40 291 However, participants also believed that too much weight gain (obesity) was perceived as bad  
41  
42 292 in the community and that community perception/attitude towards obesity has been changing.  
43  
44 293 Participants attributed this change to the information provided through media, such as  
45  
46 294 television and radio, and to increasing obesity-related disease prevalence in the community.

47  
48  
49  
50 295 *“...My mother-in-law used to say that if she saw any handsome and healthy*  
51 296 *person then she thought that the person belongs to high economic class.*  
52 297 *[...] She says it is good. However, nowadays, her view has changed. Now*  
53 298 *she says that it is not good to gain weight, and excess weight results in*  
54 299 *disease. (Female, under 40yrs.)*

55  
56  
57 300 Most participants expressed a positive attitude towards thinness and expressed their  
58  
59 301 willingness to lose weight. Those who had already faced problems or are currently facing

1  
2  
3 302 problems due to obesity/overweight, both disease-and appearance-wise, did not want to  
4  
5 303 increase their weight despite comments from their family and.

6  
7  
8 304 *“If we, the overweight people, lose weight, we get comments (from others)*  
9 305 *like- what happened, what disease you suffered from, are you stressed, and*  
10 306 *all. But we have to take care of our own body although people comment.”*  
11 307 (Female, above 40yrs.)

12  
13  
14 308 HCPs also mentioned the low self-esteem and psychological stress they found among obese  
15  
16 309 people, especially in teenagers, because of negative comments that people make about them.

17  
18 310 *“It’s like okay if someone [obese individuals] can take it easy when they*  
19 311 *are called fat [“Mote”]. Otherwise, what I also have seen among teenagers*  
20 312 *age 16-17 years is that they do not participate in dance [competitions].*  
21 313 *They do not participate in game competitions because they think people*  
22 314 *will stare at them and flatter them. Such cases come often. (Nutritionist)*  
23 315

24  
25  
26 316 HCPs commented that though excessive weight (obesity) and thinness are considered bad in  
27  
28 317 the community, overweight is still considered good. This concept is hard to change among  
29  
30 318 people, even in educated people when it comes to children. The provider described saying,

31  
32  
33 319 *“(I have seen) a woman with a lean child. She cried after seeing another*  
34 320 *chubby baby by her side grieving what had happened to her children.*  
35 321 *That was a difficult time for me [to counsel her].” (Nutritionist)*  
36 322

### 37 323 **Body size perception**

38  
39  
40 324 Before carrying out the discussion, we measured the height and weight of each FGD  
41  
42 325 participant. All participants aged 40 and above were found to be either obese or overweight.  
43  
44 326 Nevertheless, when asked what they feel about body size, the majority of them perceived that  
45  
46 327 their weight was normal.

47  
48  
49 328 *“It would be good if I could decrease my belly size. Otherwise, I feel like I*  
50 329 *am normal.” (Male, under 40yrs.)*

51  
52  
53 330 The majority of participants under 40 years had normal weight. Two participants, one male  
54  
55 331 and one female, considered themselves overweight although their measurement indicated  
56  
57 332 normal weight.

1  
2  
3 333 Most participants perceived their body size and weight by measuring their clothes' size,  
4  
5 334 evaluating themselves in mirrors, and experiencing others' comments about their body, while  
6  
7  
8 335 only a few male participants reported measuring their weight on a scale, when possible.  
9  
10 336 However, HCPs reported that the number of people who are aware of and/or interested in  
11  
12 337 measuring their weight is increasing in the community. As one said,

15 338 *"If we remember those people who measured their weight, the count will be double*  
16 339 *than our patients."* (Auxiliary Health Worker)

18 340  
19 341 **Barriers to weight management**

20 342 Challenges in behavior modification

21  
22 343 All FGD participants mentioned that diet modification and exercise are keys to prevent and  
23  
24 344 control obesity. However, only a few of the participants reported exercising to maintain or  
25  
26 345 reduce their weight. Both overweight or obese and normal-weight participants reported  
27  
28 346 similar barriers to weight management. The most commonly reported barriers were busy  
29  
30 347 schedule and laziness followed by cold weather and lack of space or physical facilities for  
31  
32 348 exercise. Participants above 40 years of age reported that comorbidities such as  
33  
34 349 musculoskeletal pain limits their level of physical activity.

35  
36 350 *"I cannot go [for exercise]. Otherwise, I want to walk. It is difficult for me*  
37 351 *to walk, my leg aches".* (Female, above 40yrs.)

38  
39 352 *"I don't have friends to walk together with. Here is no place for Yoga. [...].*  
40 353 *I also need to manage time at home"* (Female, under 40yrs.)

41  
42 354 Two female participants under 40 years of age reported that they feel normal, and thus do not  
43  
44 355 feel a need to exercise.

45  
46 356 *"We will exercise if we need to. Otherwise, it (the life) is going on. So, I*  
47 357 *feel- why should I exercise?"* (Female, under 40yrs.)

48  
49 358 Participants had a diverse opinion on the adequate level of physical activity. A Few believed  
50  
51 359 that household chores like cooking and washing clothes were adequate for exercise, while  
52  
53

1  
2  
3 360 others thought that exercise was only adequate when they sweat. Participants' required  
4  
5 361 duration of exercise ranged from 10 minutes to 3 hours a day.  
6  
7

8 362 The most frequently reported barrier for diet control was difficulty in changing food habits  
9  
10 363 due to food taste and desire to eat. Participants also mentioned the unavailability of healthy  
11  
12 364 food due to the use of excessive pesticides in vegetables and fruits. In addition, participants'  
13  
14 365 reported that the increased availability and efficiency of consuming junk food has limited  
15  
16 366 their consumption of healthier food. Consuming junk food was also a status symbol. One  
17  
18 367 participant explained that people in the community eat junk food to show that they belong to  
19  
20 368 a higher social status.  
21  
22  
23  
24

25 369 *"If our children walk taking the juice bottles and drinking juices, then that*  
26 370 *reflects a higher status. But, if they walk eating homemade popcorn, then*  
27 371 *that reflects the lower status.* (Male, under 40yrs.)  
28

#### 29 372 Lack of HCP's knowledge and anthropometric measurement tools

30  
31  
32 373 HCPs reported that overweight and obesity were identified by measuring a patient's weight  
33  
34 374 and height, by observation, and by the patient's complaint. When asked specifically about  
35  
36 375 measuring central obesity, the HCPs at the tertiary level stated that they measure waist  
37  
38 376 circumference only for those who are diabetic or have a metabolic syndrome. However, the  
39  
40 377 HCPs at the peripheral level were not aware of measuring central obesity. One put it this  
41  
42 378 way-  
43  
44  
45

46 379 *"We have not done that (measured central obesity). We do not have an*  
47 380 *instrument. We also do not have such information. If we were given an*  
48 381 *instrument and the District Health Office directed us to do so or if we*  
49 382 *were given any training...we do everything based on our knowledge. We*  
50 383 *do not have anything extra."* (Auxiliary Health Worker)  
51 384

#### 52 385 Lack of counseling

53 386  
54 387 HCPs at the peripheral level counsel to patients for 7 mins to half an hour  
55  
56 388 depending upon the patient's condition and the provider's available time. At the tertiary level,  
57  
58 389 the Nutritionist spends around half an hour to 45 minutes in counseling. However, the  
59  
60

1  
2  
3 391 medical officer at the tertiary level could only provide a maximum of 5 minutes for  
4  
5 392 counseling because of their time constraints and high daily patient volume. The medical  
6  
7  
8 393 officer mentioned that it would be helpful if they had additional assistance.  
9

10 394  
11 395 *“Yes, I think it’s a time factor (for not counseling patients). And another, I*  
12 396 *think it is helpful if we get a helping hand. One will take a note when one*  
13 397 *measure (weight), it expedites the process.” (Medical Officer)*  
14 398  
15

## 17 399 **Discussion**

18  
19 400 This study explored the perception of obesity and overweight among Nepalese adults living  
20  
21 401 in a suburban community. We found that participants had inadequate knowledge and  
22  
23 402 misconceptions regarding obesity and had perceived overweight as normal, healthy, and  
24  
25 403 attractive. The adults above 40 years of age did not perceive themselves to be overweight or  
26  
27 404 obese even when they were. Only a few participants reported exercising and controlling their  
28  
29 405 diet to prevent obesity or manage their weight.  
30  
31  
32

33 406 Obesity was perceived as a growing problem in the Dhulikhel community. A 2016 cross-  
34  
35 407 sectional study by Shrestha et. al reported the prevalence of overweight and obesity among  
36  
37 408 DHS participants of 18 years and older were as 28.4% and 8.1%, respectively.<sup>9</sup> Similarly, the  
38  
39 409 nationally conducted WHO STEPS survey in 2019 reported the prevalence of overweight and  
40  
41 410 obesity among Nepalese adults aged 15-45 years as 20% and 4.3%, respectively.<sup>6</sup> In our  
42  
43 411 study, participants reported that obesity was mainly a problem among individuals who are 40  
44  
45 412 years of age and above, married persons, office workers, businessmen, retired individuals,  
46  
47 413 and housewives. A 2011 study among civil servants in Nepal reported that married  
48  
49 414 participants were 7.5 times more likely to be overweight/obese than non-married.  
50  
51 415 Additionally, the occupation was found to be related to being overweight/obese.<sup>18</sup> Based on  
52  
53 416 the above findings, it is important to design interventional programmes targeting these  
54  
55 417 populations to prevent overweight and obesity.  
56  
57  
58  
59  
60



1  
2  
3 418 Participants mainly linked the causes of obesity to personal factors, such as fatty diet and  
4  
5 419 physical inactivity, which is similar to other studies conducted in Nepal, India, Malaysia,  
6  
7 420 South Africa, and Morocco.<sup>8 17 18 23 24</sup> Few of our participants reported heredity as a cause of  
8  
9 421 obesity. This contrasts with the result from the previous study done among civil servants in  
10  
11 422 Nepal, which found that an almost equal number of participants viewed “fatty foods” or “a  
12  
13 423 genetic disorder” as a cause of obesity.<sup>18</sup> In addition to personal factors, women in our study  
14  
15 424 stressed social and medical factors such as marriage, childbirth, the habit of eating left-overs,  
16  
17 425 and the use of contraceptives as causes of obesity and overweight among females. In  
18  
19 426 Nepalese society, gaining weight right after marriage is considered a good sign of a healthy  
20  
21 427 relationship with a husband and in-laws. Culturally, Nepalese prefers to finish the food on the  
22  
23 428 day that is cooked. As women are the last members of a household to eat, they are expected  
24  
25 429 to consume all remaining food. Additionally, women’s increased food consumption after  
26  
27 430 childbirth is believed to increase milk production and improved milk quality, and the well-  
28  
29 431 being of both mother and child. Findings from the study conducted in the Laayoun  
30  
31 432 community of Morocco also reported socio-cultural pressure as a factor for increasing weight  
32  
33 433 among females. In contrast to our study, this study reported that single females also desired to  
34  
35 434 gain weight to maintain an ideal cultural beauty. It is important to educate females of  
36  
37 435 reproductive age about obesity risks to promote a healthier lifestyle.  
38  
39  
40 436 Health and appearance are the key motives to lose weight.<sup>25 26</sup> Similar to findings from  
41  
42 437 previous studies in South Africa and Morocco,<sup>8 27</sup> participants in our study who were  
43  
44 438 concerned about the consequences of obesity and their appearance were more willing to lose  
45  
46 439 or maintain their current weight. However, it is important to consider if people are only  
47  
48 440 concerned with their appearance because the weight loss for a transient period to appear fit  
49  
50 441 and attractive, such as in social events, will not be sustainable, and the attempt to lose a lot  
51  
52 442 of weight in a short duration of time can be hazardous.  
53  
54  
55  
56  
57  
58  
59  
60

1  
2  
3 443 In our study, almost all participants who were 40 years and older underestimated their body  
4  
5 444 weight, though they all met the criteria of overweight and obese. This finding is similar to  
6  
7 445 studies conducted in Tanzania,<sup>11</sup> Cameroon<sup>27</sup>, and in the United States.<sup>23</sup> Additionally,  
8  
9 446 studies have also reported variation in weight estimation by gender and age.<sup>8 28</sup> A qualitative  
10  
11 447 study in South Africa reported that the majority of overweight and obese female participants  
12  
13 448 perceived themselves to be normal or moderately overweight, and chose the silhouettes that  
14  
15 449 were smaller than their body size.<sup>8</sup> A cross-sectional study in Morocco reported that more  
16  
17 450 females than males underestimated their body weight and males 40 years of age and above  
18  
19 451 were more likely to underestimate their weight compared to females in the same age group.<sup>27</sup>  
20  
21 452 Individuals who do not perceive themselves as overweight and obese are likely to gain more  
22  
23 453 weight due to their low-risk perception and unwillingness to lose weight.<sup>8 11 12</sup> The inability  
24  
25 454 for our participants to accurately recognize their body-weight status may prevent them from  
26  
27 455 adopting healthy behaviors and increase their risk to obesity and its complications. Therefore,  
28  
29 456 the community should be made aware of the importance of measuring their weight at  
30  
31 457 intervals, and health facilities should also increase educational campaigns to improve  
32  
33 458 community awareness.

34  
35 459 In Nepal, a big belly is culturally accepted as a sign of prosperity.<sup>7 18</sup> Participants' perception  
36  
37 460 that overweight is considered good, healthy, and attractive is consistent with other studies  
38  
39 461 conducted in South Africa, Morocco, and the United States.<sup>8 23 27</sup> Most strikingly, this was  
40  
41 462 frequently reported by females under 40 years of age. Research has shown that females may  
42  
43 463 be more accepting of obesity than men, and thus have a less negative attitude towards obese  
44  
45 464 individuals.<sup>29</sup> However, further studies on the role of gender in weight-related acceptance are  
46  
47 465 needed.

48  
49 466 Although overweight is acceptable, participants have a negative attitude towards an obese  
50  
51 467 person. This reflects the finding of several other studies,<sup>8 15 23 30</sup> whereby obese individuals



1  
2  
3 468 are viewed as lazy, heavy, unattractive, and are perceived to have illnesses associated with  
4  
5 469 obesity. Studies have also shown the consequences of others' negative attitudes among obese  
6  
7 470 persons.<sup>8 15 18 23 30</sup> For example, a study in Cameroon reported that overweight Caucasian and  
8  
9 471 African American women were viewed differently and were discriminated against despite  
10  
11 472 their hard work.<sup>23</sup> Such internalized stigma among obese individuals is particularly from the  
12  
13 473 belief that obesity is a result of an individual's failure to maintain a healthy lifestyle.<sup>15</sup>  
14  
15 474 Considering the fact that participants in our study primarily pointed out the internal factors  
16  
17 475 such as diet and exercise, as causes of obesity, it is important to make people aware of socio-  
18  
19 476 cultural and medical factors to reduce obesity-related stigma and negative attitude.<sup>15</sup> Further  
20  
21 477 studies to explore the impact of negative attitudes on overweight or obese individuals in  
22  
23 478 Nepal would be beneficial to develop interventional programmes in this setting.  
24  
25  
26 479 Adequate exercise and a healthy diet are keys to managing obesity and other chronic  
27  
28 480 diseases.<sup>31</sup> Although participants in our study were aware that a healthy lifestyle will benefit  
29  
30 481 them, they did not implement it. This difference in knowledge and practice has been  
31  
32 482 described in many studies.<sup>8 32-34</sup> This could be due to low awareness of obesity complications.  
33  
34 483 In our study, both the overweight and normal-weight participants reported similar barriers to  
35  
36 484 weight management. This could be because only a few participants in our study reported  
37  
38 485 exercising or controlling a diet to reduce or prevent obesity. Moreover, participants who were  
39  
40 486 overweight did not perceive themselves as overweight and did not feel the need to change  
41  
42 487 their behavior. The cultural acceptance of overweight in Nepalese culture and the difficulties  
43  
44 488 in modifying behavior could be a challenge to implementing the effective intervention  
45  
46 489 programme in this setting.  
47  
48  
49 490 As in other low and middle-income countries,<sup>15 35 36</sup> obesity is primarily assessed based on  
50  
51 491 BMI in Nepal. However, BMI cannot differentiate between weight because of excessive  
52  
53 492 muscle percentage and body fat proportions.<sup>15</sup> Studies have shown that people with normal

1  
2  
3 493 BMI are at risk of cardiovascular diseases because of central obesity.<sup>15 35 36</sup> The prevalence  
4  
5 494 of central obesity has been increasing among South Asians. A 2006 study in Nepal reported  
6  
7 495 a higher prevalence of central obesity than general obesity among the study population in  
8  
9 496 Dharan.<sup>37</sup> Similarly, a study in China reported that the prevalence of central obesity among  
10  
11 497 adults with BMI <25kg/m<sup>2</sup> increased by almost two-fold from 11.9% in 1993 to 21.1% in  
12  
13 498 2009. If the study did not consider measuring WC for obesity, they would have missed 65%  
14  
15 499 of the cases.<sup>36</sup> This highlights the importance of measuring WC to accurately measure obesity  
16  
17 500 in clinical settings.

21  
22 501 This study is the first qualitative study in Nepal that aimed to understand the perception of  
23  
24 502 obesity among adults in a sub-urban community from both community and healthcare  
25  
26 503 providers' perspectives. The use of open-ended questions provided insights into participants'  
27  
28 504 perspectives and lived experiences. However, several limitations exist. This study is  
29  
30 505 confined to the sub-urban area; therefore, the perception of urban and rural areas is  
31  
32 506 underrepresented. However, a qualitative study is intended to understand a phenomenon, and  
33  
34 507 not to analyse the relationship between variables.<sup>33 34</sup> All the FGD participants belonged to  
35  
36 508 the Hindu religion; therefore, the study could not explore the perception of individuals of  
37  
38 509 other religions. However, the majority of the population in this area are Hindu. Although few  
39  
40 510 numbers of health providers were interviewed in this study, we have considered to include  
41  
42 511 them from the different health care levels. Given these limitations, however, the study  
43  
44 512 provides profound information on the community's perception of obesity in Nepal.

## 51 **Conclusions**

52  
53 514 This qualitative study explored the knowledge, attitude, and perception of obesity among  
54  
55 515 Nepalese adults in a suburban community. Given the participants' misconception and  
56  
57 516 inadequate knowledge regarding obesity, and the underestimation of their body size, it is  
58  
59  
60

1  
2  
3 517 suggested to design and disseminate culturally appropriate health information to manage  
4  
5 518 obesity in the community. Our finding shows that the healthcare providers at the peripheral  
6  
7 519 health institutions lack training and instrument to measure central obesity. Since the  
8  
9 520 prevalence of central obesity is rising in South Asians, including the Nepalese population, it  
10  
11 521 is important to consider central obesity while training health workers at the peripheral level.  
12  
13  
14

15 522  
16  
17  
18

### 19 523 **List of abbreviations**

20 524 BMI: Body Mass Index

21 525 FGD: Focus Group Discussion

22 526 HCP: Healthcare Provider

23 527 IDI: In-depth Interview

24 528 STEPS: STEPwise approach to surveillance

25 529 WHO: World Health Organization

### 26 530 **Declarations**

### 27 531 **Acknowledgments**

28 532 This study was supported by grants from the Wide Open Vistas, United States. We  
29 533 acknowledge the support of Dhulikhel Hospital for allowing us to conduct this study. We also  
30 534 thank all participants for providing their invaluable contribution to the study.

### 31 535 **Author contributions**

32 536 SS, the principal investigator, conceived the study, transcribed and analysed data, and  
33 537 developed the manuscript. BMK and RK contributed to the research design. SA contributed

1  
2  
3 538 to collecting and analysing the data. SSu contributed to revising the manuscript. All authors  
4  
5 539 read and approved the final manuscript for publication.  
6  
7

8 **540 Funding**

9  
10 541 This work was supported by the Wide Open Vistas [grant number WOV-002].  
11  
12

13 **542 Competing interests**

14  
15 543 None declared  
16  
17

18 **544 Patient consent for publication**

19  
20 545 Not required.  
21  
22

23 **546 Ethics approval**

24  
25 547 Ethical approval was obtained from the Kathmandu University School of Medical Sciences  
26  
27 548 Institutional Review Committee (IRB# 36/16).  
28  
29

30 **549 Provenance and peer review**

31  
32 550 Not commissioned, externally peer reviewed.  
33  
34  
35  
36  
37

38 **551 Data availability statement**

39  
40 552 No data are available.  
41  
42  
43  
44  
45  
46  
47  
48  
49  
50  
51  
52  
53  
54  
55  
56  
57  
58  
59  
60

559

560 **References**

- 561 1. World Health Organization. Global health risks : mortality and burden of disease  
562 attributable to selected major risks. Geneva: World Health Organization, 2009.
- 563 2. Zalesin KC, Franklin BA, Miller. WM, et al. Impact of obesity on cardiovascular disease.  
564 *Medical Clinics of North America* 2011;95(5):919-37. doi:  
565 10.1016/j.mcna.2011.06.005
- 566 3. Colditz GA, Willett WC, Stampfer MJ, et al. Weight as a risk factor for clinical diabetes in  
567 women. *American journal of epidemiology* 1990;132(3):501-13.
- 568 4. Colditz GA, Willett WC, Rotnitzky A, et al. Weight gain as a risk factor for clinical  
569 diabetes mellitus in women. *Annals of internal medicine* 1995;122(7):481-86.
- 570 5. Yoon K-H, Lee J-H, Kim J-W, et al. Epidemic obesity and type 2 diabetes in Asia. *The*  
571 *Lancet* 2006;368(9548):1681-88.
- 572 6. Dhimal M, Bista B, Bhattarai S, et al. Report of Non Communicable Disease Risk Factors:  
573 STEPS Survey Nepal 2019. Kathmandu, 2020.
- 574 7. Vaidya A, Shakya S, Krettek A. Obesity prevalence in Nepal: public health challenges in a  
575 low-income nation during an alarming worldwide trend. *Int J Environ Res Public*  
576 *Health* 2010;7(6):2726-44. doi: 10.3390/ijerph7062726
- 577 8. Okop KJ, Mukumbang FC, Mathole T, et al. Perceptions of body size, obesity threat and  
578 the willingness to lose weight among black South African adults: a qualitative study.  
579 *BMC Public Health* 2016;16:365. doi: 10.1186/s12889-016-3028-7 [published Online  
580 First: 2016/04/29]
- 581 9. Shrestha A, Koju RP, Beresford SAA, et al. Reproducibility and relative validity of food  
582 group intake in a food frequency questionnaire developed for Nepalese diet. *Int J*  
583 *Food Sci Nutr* 2017;68(5):605-12. doi: 10.1080/09637486.2016.1268099 [published  
584 Online First: 2017/01/16]
- 585 10. Mishra SR, Neupane D, Bhandari PM, et al. Burgeoning burden of non-communicable  
586 diseases in Nepal: a scoping review. *Global Health* 2015;11(1):32. doi:  
587 10.1186/s12992-015-0119-7
- 588 11. Muhihi AJ, Njelekela MA, Mpembeni R, et al. Obesity, Overweight, and Perceptions  
589 about Body Weight among Middle-Aged Adults in Dar es Salaam, Tanzania. *ISRN*  
590 *Obes* 2012;2012:368520. doi: 10.5402/2012/368520
- 591 12. Awah PK, Kengne AP, Fezeu LL, et al. Perceived risk factors of cardiovascular diseases  
592 and diabetes in Cameroon. *Health Educ Res* 2008;23(4):612-20. doi:  
593 10.1093/her/cym037
- 594 13. Mellor D, Fuller-Tyszkiewicz M, McCabe MP, et al. Body image and self-esteem across  
595 age and gender: A short-term longitudinal study. *Sex roles* 2010;63(9-10):672-81.
- 596 14. Koju RP, Karmacharya BM, Shrestha A, et al. Design of the Dhulikhel Heart Study  
597 (DHS): The epidemiology of emerging cardiovascular disease in Nepal. *Annals of*  
598 *Global Health* 2014;80(3):204-05.
- 599 15. Sikorski C, Riedel C, Luppia M, et al. Perception of overweight and obesity from different  
600 angles: a qualitative study. *Scand J Public Health* 2012;40(3):271-7. doi:  
601 10.1177/1403494812443604
- 602 16. Rguibi M, Belahsen R. Body size preferences and sociocultural influences on attitudes  
603 towards obesity among Moroccan Sahraoui women. *Body Image* 2006;3(4):395-400.  
604 doi: 10.1016/j.bodyim.2006.07.007 [published Online First: 2006/09/07]

17. Agrawal P, Gupta K, Mishra V, et al. A study on body-weight perception, future intention and weight-management behaviour among normal-weight, overweight and obese women in India. *Public health nutrition* 2014;17(4):884-95.
18. Simkhada P, Poobalan A, Simkhada PP, et al. Knowledge, attitude, and prevalence of overweight and obesity among civil servants in Nepal. *Asia Pacific Journal of Public Health* 2011;23(4):507-17.
19. Oli N, Vaidya A, Subedi M, et al. Diet and physical activity for children's health: a qualitative study of Nepalese mothers' perceptions. *BMJ open* 2015;5(9)
20. Tamrakar D, Shrestha A, Rai A, et al. Drivers of healthy eating in a workplace in Nepal: a qualitative study. *BMJ open* 2020;10(2):e031404.
21. Swain J. A hybrid approach to thematic analysis in qualitative research: Using a practical example: SAGE Publications Ltd 2018.
22. Braun V, Clarke V, Cooper H. APA handbook of research methods in psychology. *Cooper H, Thematic analysis* 2012;2
23. Blixen CE, Singh A, Thacker H. Values and beliefs about obesity and weight reduction among African American and Caucasian women. *J Transcult Nurs* 2006;17(3):290-7. doi: 10.1177/1043659606288375
24. Chang C, Chang K, WL C. Adult's perception of being overweight and obese: a focus group study. *Asia Pac J Clin Nutr* 2009;18 ( 2):257-64 25.
25. Cheskin LJ, Donze LF. Appearance vs health as motivators for weight loss. *JAMA* 2001;286(17):2160-60.
26. Teixeira PJ, Silva MN, Mata J, et al. Motivation, self-determination, and long-term weight control. *International Journal of Behavioral Nutrition and Physical Activity* 2012;9(1):22.
27. Lahmam A, Baali A, Hilali MK, et al. Obesity, overweight and body-weight perception in a High Atlas Moroccan population. *Obes Rev* 2008;9(2):93-9. doi: 10.1111/j.1467-789X.2007.00413.x
28. Greener J, Douglas F, van Teijlingen E. More of the same? Conflicting perspectives of obesity causation and intervention amongst overweight people, health professionals and policy makers. *Social science & medicine* 2010;70(7):1042-49.
29. Pantenburg B, Sikorski C, Luppia M, et al. Medical students' attitudes towards overweight and obesity. *PLoS One* 2012;7(11):e48113.
30. Cossrow NH, Jeffery RW, McGuire MT. Understanding weight stigmatization: a focus group study. *J Nutr Educ* 2001;33(4):208-14.
31. Ard JD, Svetkey LP. Diet and blood pressure: applying the evidence to clinical practice. *Am Heart J* 2005;149(5):804-12. doi: 10.1016/j.ahj.2005.01.040
32. Risso-Gill I, Balabanova D, Majid F, et al. Understanding the modifiable health systems barriers to hypertension management in Malaysia: a multi-method health systems appraisal approach. *BMC Health Serv Res* 2015;15:254. doi: 10.1186/s12913-015-0916-y
33. Mothiba T, Malema R, Lekhuleni M. The experiences of the newly diagnosed hypertensive patients admitted into tertiary hospital campus in Limpopo Province, South Africa. *African Journal for Physical, Health Education, Recreation and Dance (AJPHERD)* 2013:213-21.
34. Shrestha S. Barriers and Facilitators to Treatment among Newly Diagnosed Hypertensive Patients in Nepal: a Qualitative Study. 2016
35. Poobalan A, Aucott L. Obesity Among Young Adults in Developing Countries: A Systematic Overview. *Curr Obes Rep* 2016;5(1):2-13. doi: 10.1007/s13679-016-0187-x

1  
2  
3  
4  
5  
6  
7  
8  
9  
10  
11  
12  
13  
14  
15  
16  
17  
18  
19  
20  
21  
22  
23  
24  
25  
26  
27  
28  
29  
30  
31  
32  
33  
34  
35  
36  
37  
38  
39  
40  
41  
42  
43  
44  
45  
46  
47  
48  
49  
50  
51  
52  
53  
54  
55  
56  
57  
58  
59  
60

654 36. Du T, Sun X, Yin P, et al. Increasing trends in central obesity among Chinese adults with  
655 normal body mass index, 1993–2009. *BMC public health* 2013;13(1):327.  
656 37. Vaidya AK, Pokharel PK, Nagesh S, et al. Association of obesity and physical activity in  
657 adult males of Dharan, Nepal. 2006

For peer review only



## Standards for Reporting Qualitative Research (SRQR)<sup>a</sup>

| No. | Topic                                                   | Item                                                                                                                                                                                                                                                                                                                                     | Page/<br>line<br>no(s). |
|-----|---------------------------------------------------------|------------------------------------------------------------------------------------------------------------------------------------------------------------------------------------------------------------------------------------------------------------------------------------------------------------------------------------------|-------------------------|
|     | <b>Title and abstract</b>                               |                                                                                                                                                                                                                                                                                                                                          |                         |
| S1  | Title                                                   | Concise description of the nature and topic of the study identifying the study as qualitative or indicating the approach (e.g., ethnography, grounded theory) or data collection methods (e.g., interview, focus group) is recommended                                                                                                   | 1                       |
| S2  | Abstract                                                | Summary of key elements of the study using the abstract format of the intended publication; typically includes objective, methods, results, and conclusions                                                                                                                                                                              | 2                       |
|     | <b>Introduction</b>                                     |                                                                                                                                                                                                                                                                                                                                          |                         |
| S3  | Problem formulation                                     | Description and significance of the problem/phenomenon studied; review of relevant theory and empirical work; problem statement                                                                                                                                                                                                          | 4                       |
| S4  | Purpose or research question                            | Purpose of the study and specific objectives or questions                                                                                                                                                                                                                                                                                | 4                       |
|     | <b>Methods</b>                                          |                                                                                                                                                                                                                                                                                                                                          |                         |
| S5  | Qualitative approach and research paradigm <sup>b</sup> | Qualitative approach (e.g., ethnography, grounded theory, case study, phenomenology, narrative research) and guiding theory if appropriate; identifying the research paradigm (e.g., positivist, constructivist/interpretivist) is also recommended                                                                                      | 5                       |
| S6  | Researcher characteristics and reflexivity              | Researchers' characteristics that may influence the research, including personal attributes, qualifications/experience, relationship with participants, assumptions, or presuppositions; potential or actual interaction between researchers' characteristics and the research questions, approach, methods, results, or transferability | 6                       |
| S7  | Context <sup>b</sup>                                    | Setting/site and salient contextual factors; rationale <sup>a</sup>                                                                                                                                                                                                                                                                      | 5                       |
| S8  | Sampling strategy <sup>b</sup>                          | How and why research participants, documents, or events were selected; criteria for deciding when no further sampling was necessary (e.g., sampling saturation); rationale <sup>a</sup>                                                                                                                                                  | 5                       |
| S9  | Ethical issues pertaining to human subjects             | Documentation of approval by an appropriate ethics review board and participant consent, or explanation for lack thereof; other confidentiality and data security issues                                                                                                                                                                 | 20                      |
| S10 | Data collection methods <sup>b</sup>                    | Types of data collected; details of data collection procedures including (as appropriate) start and stop dates of data collection and analysis, iterative process, triangulation of sources/methods, and modification of procedures in response to evolving study findings; rationale <sup>a</sup>                                       | 5-6                     |
| S11 | Data collection instruments and technologies            | Description of instruments (e.g., interview guides, questionnaires) and devices (e.g., audio recorders) used for data collection; if/how the instrument(s) changed over the course of the study                                                                                                                                          | 5-6                     |



|                         |                                                                                              |                                                                                                                                                                                                                                                                                                       |          |
|-------------------------|----------------------------------------------------------------------------------------------|-------------------------------------------------------------------------------------------------------------------------------------------------------------------------------------------------------------------------------------------------------------------------------------------------------|----------|
| S12                     | Units of study                                                                               | Number and relevant characteristics of participants, documents, or events included in the study; level of participation (could be reported in results)                                                                                                                                                | 5-6, 7-8 |
| S13                     | Data processing                                                                              | Methods for processing data prior to and during analysis, including transcription, data entry, data management and security, verification of data integrity, data coding, and anonymization/deidentification of excerpts                                                                              | 6        |
| S14                     | Data analysis <sup>b</sup>                                                                   | Process by which inferences, themes, etc., were identified and developed, including researchers involved in data analysis; usually references a specific paradigm or approach; rationale <sup>a</sup>                                                                                                 | 6,8-9    |
| S15                     | Techniques to enhance trustworthiness <sup>b</sup>                                           | Techniques to enhance trustworthiness and credibility of data analysis (e.g., member checking, audit trail, triangulation); rationale <sup>a</sup>                                                                                                                                                    | 6        |
| <b>Results/Findings</b> |                                                                                              |                                                                                                                                                                                                                                                                                                       |          |
| S16                     | Synthesis and interpretation                                                                 | Main findings (e.g., interpretations, inferences, and themes); might include development of a theory or model, or integration with prior research or theory                                                                                                                                           | 7-15     |
| S17                     | Links to empirical data                                                                      | Evidence (e.g., quotes, field notes, text excerpts, photographs) to substantiate analytic findings                                                                                                                                                                                                    | 9-15     |
| <b>Discussion</b>       |                                                                                              |                                                                                                                                                                                                                                                                                                       |          |
| S18                     | Integration with prior work, implications, transferability, and contribution(s) to the field | Short summary of main findings; explanation of how findings and conclusions connect to, support, elaborate on, or challenge conclusions of earlier scholarship; discussion of scope of application/generalizability; identification of unique contribution(s) to scholarship in a discipline or field | 15-18    |
| S19                     | Limitations                                                                                  | Trustworthiness and limitations of findings                                                                                                                                                                                                                                                           | 18       |
| <b>Other</b>            |                                                                                              |                                                                                                                                                                                                                                                                                                       |          |
| S20                     | Conflicts of interest                                                                        | Potential sources of influence or perceived influence on study conduct and conclusions; how these were managed                                                                                                                                                                                        | 20       |
| S21                     | Funding                                                                                      | Sources of funding and other support; role of funders in data collection, interpretation, and reporting                                                                                                                                                                                               | 19       |

<sup>a</sup>The authors created the SRQR by searching the literature to identify guidelines, reporting standards, and critical appraisal criteria for qualitative research; reviewing the reference lists of retrieved sources; and contacting experts to gain feedback. The SRQR aims to improve the transparency of all aspects of qualitative research by providing clear standards for reporting qualitative research.

<sup>b</sup>The rationale should briefly discuss the justification for choosing that theory, approach, method, or technique rather than other options available, the assumptions and limitations implicit in those choices, and how those choices influence study conclusions and transferability. As appropriate, the rationale for several items might be discussed together.

Reference: O'Brien BC, Harris IB, Beckman TJ, Reed DA, Cook DA. Standards for reporting qualitative research: a synthesis of recommendations. *Academic Medicine*, Vol. 89, No. 9 / Sept 2014 DOI: 10.1097/ACM.0000000000000388

# BMJ Open

## Perception of obesity and overweight among adults living in suburban Nepal: A qualitative study

|                                 |                                                                                                                                                                                                                                                                                                                                                                                                                                                                                                                                                                                |
|---------------------------------|--------------------------------------------------------------------------------------------------------------------------------------------------------------------------------------------------------------------------------------------------------------------------------------------------------------------------------------------------------------------------------------------------------------------------------------------------------------------------------------------------------------------------------------------------------------------------------|
| Journal:                        | <i>BMJ Open</i>                                                                                                                                                                                                                                                                                                                                                                                                                                                                                                                                                                |
| Manuscript ID                   | bmjopen-2020-043719.R2                                                                                                                                                                                                                                                                                                                                                                                                                                                                                                                                                         |
| Article Type:                   | Original research                                                                                                                                                                                                                                                                                                                                                                                                                                                                                                                                                              |
| Date Submitted by the Author:   | 07-Apr-2021                                                                                                                                                                                                                                                                                                                                                                                                                                                                                                                                                                    |
| Complete List of Authors:       | Shrestha, Sachita; Dhulikhel Hospital, Department of Community Programmes; University of North Carolina at Chapel Hill School of Medicine, UNC Linberger Comprehensive Cancer Center<br>Asthane, Shanta; Dhulikhel Hospital, Department of Community Programmes<br>Karmacharya, Biraj Man; Kathmandu University School of Medical Sciences, Department of Public Health; Dhulikhel Hospital, Department of Community Programmes<br>Subedi, Seema; Johns Hopkins University, Department of International Health<br>Koju, Rajendra; Dhulikhel Hospital, Department of Cardiology |
| <b>Primary Subject Heading</b>: | Public health                                                                                                                                                                                                                                                                                                                                                                                                                                                                                                                                                                  |
| Secondary Subject Heading:      | Qualitative research, Cardiovascular medicine, Diabetes and endocrinology, Nutrition and metabolism                                                                                                                                                                                                                                                                                                                                                                                                                                                                            |
| Keywords:                       | PUBLIC HEALTH, QUALITATIVE RESEARCH, PREVENTIVE MEDICINE, PRIMARY CARE                                                                                                                                                                                                                                                                                                                                                                                                                                                                                                         |
|                                 |                                                                                                                                                                                                                                                                                                                                                                                                                                                                                                                                                                                |

SCHOLARONE™  
Manuscripts



I, the Submitting Author has the right to grant and does grant on behalf of all authors of the Work (as defined in the below author licence), an exclusive licence and/or a non-exclusive licence for contributions from authors who are: i) UK Crown employees; ii) where BMJ has agreed a CC-BY licence shall apply, and/or iii) in accordance with the terms applicable for US Federal Government officers or employees acting as part of their official duties; on a worldwide, perpetual, irrevocable, royalty-free basis to BMJ Publishing Group Ltd ("BMJ") its licensees and where the relevant Journal is co-owned by BMJ to the co-owners of the Journal, to publish the Work in this journal and any other BMJ products and to exploit all rights, as set out in our [licence](#).

The Submitting Author accepts and understands that any supply made under these terms is made by BMJ to the Submitting Author unless you are acting as an employee on behalf of your employer or a postgraduate student of an affiliated institution which is paying any applicable article publishing charge ("APC") for Open Access articles. Where the Submitting Author wishes to make the Work available on an Open Access basis (and intends to pay the relevant APC), the terms of reuse of such Open Access shall be governed by a Creative Commons licence – details of these licences and which [Creative Commons](#) licence will apply to this Work are set out in our licence referred to above.

Other than as permitted in any relevant BMJ Author's Self Archiving Policies, I confirm this Work has not been accepted for publication elsewhere, is not being considered for publication elsewhere and does not duplicate material already published. I confirm all authors consent to publication of this Work and authorise the granting of this licence.

1  
2  
3  
4  
5 **1 Perception of obesity and overweight among adults living in suburban**  
6 **2 Nepal: A qualitative study**

8 3 Sachita Shrestha<sup>1,2</sup>, Shanta Asthane<sup>1</sup>, Biraj Man Karmacharya<sup>1,3</sup>, Seema Subedi<sup>4</sup>, Rajendra  
9 4 Koju<sup>5</sup>

11 5 **Author affiliation**

13 6 <sup>1</sup> Department of Community Programmes, Dhulikhel Hospital-Kathmandu University  
14 7 Hospital, Dhulikhel, Nepal

15 8 <sup>2</sup> Linberger Comprehensive Cancer Center, University of North Carolina

16 9 <sup>3</sup>Department of Public Health, Kathmandu University School of Medical Sciences,  
17 10 Kathmandu, Nepal

18 11 <sup>4</sup>Department of International Health, John Hopkins Bloomberg School of Public Health,  
19 12 Baltimore, Maryland, USA

20 13 <sup>5</sup>Department of Cardiology, Dhulikhel Hospital-Kathmandu University Hospital, Dhulikhel,  
21 14 Nepal

22 15  
23 16 **Corresponding author:** Sachita Shrestha, Linberger Comprehensive Cancer Center,  
24 17 University of North Carolina, Chapel Hill, NC 27599. Email: [sachizshrestha@gmail.com](mailto:sachizshrestha@gmail.com).  
25 18 Contact number: 1-352-214-5020.

26 19  
27 20 Word count: 5,408

28 21 References: 47  
29  
30  
31  
32  
33  
34  
35  
36  
37  
38  
39  
40  
41  
42  
43  
44  
45  
46  
47  
48  
49  
50  
51  
52  
53  
54  
55  
56  
57  
58  
59  
60

1  
2  
3 36 **Abstract**

4  
5 37 **Objective**

6  
7 38 To explore the perception of obesity and overweight among Nepalese adults living in a  
8  
9 39 suburban community.

10  
11 40 **Design**

12  
13 41 A qualitative study comprising of focus group discussion and in-depth interview.

14  
15  
16 42 **Setting**

17  
18 43 Community and health care facilities in Dhulikhel, Nepal.

19  
20  
21 44 **Participants**

22  
23 45 Four focus group discussions were conducted with community members (n= 22) and four in-  
24  
25 46 depth interviews were conducted with healthcare providers.

26  
27  
28 47 **Results**

29  
30 48 Obesity is a rising problem in this suburban community. Participants had inadequate  
31  
32 49 knowledge regarding the consequences of obesity, and they perceived overweight as normal,  
33  
34 50 healthy, and attractive. The participants above 40 years of age did not perceive themselves to  
35  
36 51 be overweight or obese. Despite participants' awareness of the importance of diet control  
37  
38 52 and exercise to prevent obesity, these were not translated into practice.

39  
40  
41  
42 53 **Conclusions**

43  
44 54 This study provided insight into perceptions of obesity in a suburban Dhulikhel community  
45  
46 55 through both community members' and healthcare providers' perspective. Misconceptions  
47  
48 56 and inadequate knowledge of obesity among people in this community indicate the need for  
49  
50 57 health education and interventional programme to increase health awareness and preventive  
51  
52 58 practices.

53  
54  
55  
56 59 **Keywords:** obesity, overweight, perception, qualitative study, Nepal, public health,  
57  
58 60 cardiovascular disease

## 61 **Strengths and limitations of this study**

- 62 • To our knowledge, this is the first qualitative study in Nepal to explore the perception of  
63 obesity among adults in a suburban community in Nepal.
- 64 • The study includes in-depth views of both community members and health care providers  
65 working at different levels.
- 66 • The study is limited to the Dhulikhel Heart Study participants residing in a suburban area;  
67 therefore, the findings of the study may not be transferable to rural or urban areas.
- 68 • This study provides information on obesity and its perceived threat in a resource-poor  
69 setting. The study has generated recommendations and possible strategies for obesity and  
70 NCD prevention in the vulnerable population in Nepal.

## 82 **Background**

83 Obesity is one of the top five causes of cardiovascular mortality and morbidity globally[1]  
84 causing an increased risk of coronary artery disease, diabetes mellitus, hypertension, and  
85 kidney failure.[2] The rate of obesity has increased in many developing nations, including in  
86 Nepal.[3–5] About 24.3% of Nepalese adults are obese or overweight.[6]

87 Several demographic, socio-economic, and cultural factors contributing to obesity have been  
88 described elsewhere.[7–9] Like other developing countries, Nepal is undergoing  
89 epidemiologic and demographic transition, experiencing significant lifestyle changes.[7–10]  
90 Urbanization, leading to an increased number of fast-food restaurants, the growing culture of  
91 ‘eating out’, and the availability of lower-priced, higher caloric food have contributed to  
92 obesity. The 2019 WHO STEP survey reported low physical activity and low vegetable and  
93 fruit consumption in Nepal.[6]

94 Studies have found a relationship between obesity and body weight/size perception. Unlike in  
95 developed countries, a heavier body is preferred in many developing countries, such as South  
96 Africa and Tanzania.[8,11] In Nepal, traditionally, having a ‘big belly’ is considered a sign of  
97 prosperity.[7] This perceived norm might be facilitating weight gain, particularly among  
98 high-income individuals and families. However, with epidemiologic transitions and  
99 technological advancements occurring globally, this perception may be changing. It is also  
100 important to understand how the individual perceives their body size. The individuals who do  
101 not see themselves as overweight/ obese are prone to gain weight because of their low-risk  
102 perception and unwillingness to lose weight.[8,11,12] On the other hand, females generally  
103 misperceive body weight, deeming it higher than it is, and thus are dissatisfied with their  
104 bodies compared to males.[13]

105 In 2015, the Dhulikhel Heart Study, a population-based cohort study on cardiovascular  
106 disease and its risk factors, was conducted among adults living in Dhulikhel, a suburban town

1  
2  
3 107 in Nepal.[14] The study found a high prevalence of cardiovascular disease and its risk factors,  
4  
5 108 such as obesity. Given the high prevalence of obesity and poor cardiovascular health literacy,  
6  
7  
8 109 the development of effective health education and interventional programmes to manage  
9  
10 110 obesity in this community is vital. Though studies regarding obesity perception have been  
11  
12 111 conducted in many low- and middle-income countries (LMICs),[8,15–17] information on  
13  
14 112 body size self-perception and willingness to lose weight among Nepalese adults is limited. In  
15  
16  
17 113 2009, Simkhada et.al conducted a cross-sectional study to assess knowledge, attitude, and  
18  
19 114 prevalence of overweight and obesity among civil servants in Nepal.[18] Few qualitative  
20  
21 115 studies that have been conducted in this context focus primarily on diet and exercise.[19,20]  
22  
23  
24 116 To our understanding, there are no qualitative studies conducted to date exploring body size  
25  
26 117 perception and willingness to lose weight among adults in Nepal. Also, no studies exist to  
27  
28 118 understand obesity from the healthcare provider's perspective in Nepal. Our study aims to  
29  
30 119 fulfill the above-mentioned gaps in knowledge by exploring the perception of obesity and  
31  
32 120 overweight among Nepalese adults, including both community members and healthcare  
33  
34 121 providers (HCP).  
35  
36  
37  
38

## 39 122 **METHODS**

### 40 123 **Study design and setting**

41  
42  
43  
44 124 This was a qualitative study under a large cohort study, the Dhulikhel Heart Study (DHS),  
45  
46 125 which is a longitudinal cohort study conducted between November 2013 and February 2015  
47  
48 126 to assess the prevalence of cardiovascular diseases and its risk factors among adults of 18  
49  
50 127 years and older living in Dhulikhel, a sub-urban town in Nepal.[14]  
51  
52  
53

### 54 128 **Participants**

55  
56  
57 129 We conducted four focus group discussions (FGD) with 22 DHS participants. We used FGDs  
58  
59 130 for community members as this method is proven to adequately gather information on the  
60



1  
2  
3 131 perception of obesity among adults in LMICs.[8,15] Participants were selected using  
4  
5 132 purposeful sampling methods. A list of DHS participants was obtained and stratified into four  
6  
7 133 groups by gender (male and female) and age (<40years and  $\geq$ 40years). The separation of  
8  
9 134 gender was necessary because women in Nepalese culture are usually shy and do not discuss  
10  
11 135 explicitly in presence of men. The researcher contacted 12 eligible participants from each  
12  
13 136 group via phone call to request participation in the study. Participants who provided verbal  
14  
15 137 consent were invited for discussions. Of the total 48 eligible participants who agreed to  
16  
17 138 participate, 22 took part in the group discussions. Six participants who initially agreed to  
18  
19 139 participate did not attend the discussion. Altogether 26 eligible participants did not participate  
20  
21 140 in the study. The reasons for non-participation were busy schedules on the given time and  
22  
23 141 date and medical illness.

24  
25  
26  
27  
28  
29 142 For the in-depth interview (IDI), we purposefully selected four health providers (HPs) from  
30  
31 143 different healthcare levels to explore barriers to obesity management. We selected one doctor  
32  
33 144 and a nutritionist from the tertiary hospital, an in-charge from a primary health care center,  
34  
35 145 and an in-charge from an urban health care center. All HCPs who were invited agreed to  
36  
37 146 participate in the study and were interviewed.

#### 38 39 40 41 147 **Data collection**

42  
43  
44 148 We collected data from October 2016 to December 2016. We developed initial guidelines in  
45  
46 149 Nepali. The FGD guideline was pilot tested among 6 DHS participants, and the IDI guideline  
47  
48 150 was pre-tested with a doctor in the tertiary hospital. The guidelines were then reviewed and  
49  
50 151 modified accordingly. The findings from the pre-tested FGD and IDI were not included in  
51  
52 152 this analysis.

53  
54  
55  
56 153 All FGDs were moderated by the researcher and assisted by a note-taker. The moderator was  
57  
58 154 not from the study community and, hence had no prior knowledge about the participants  
59  
60

1  
2  
3 155 before the study. The moderator started each session by briefly explaining the aim of the  
4  
5 156 study and receiving informed consent. Participants' height and weight were also measured  
6  
7 157 before the discussion commenced. The moderator started the discussion with open-ended  
8  
9  
10 158 questions and probed further for in-depth information. The FGD guideline included 10-item  
11  
12 159 questions under four topics— body size perception; knowledge on obesity; attitude towards  
13  
14 160 obesity; and barriers to weight management. For the perception of body size, we asked  
15  
16 161 participants' views on their body size, and then probed why they think their body is normal or  
17  
18 162 overweight or obese and how they measure their body size. To explore participants'  
19  
20 163 knowledge of obesity, we asked questions on the perceived cause and complications of  
21  
22 164 obesity and further probed if certain groups in the community are perceived as more obese  
23  
24 165 than others. On attitude towards obesity, we asked the following questions, 'How do you  
25  
26 166 view overweight and obesity?', and 'What influences society's views on obesity?' Regarding  
27  
28 167 the willingness to lose weight or maintain optimally, we asked about the perceived barriers to  
29  
30 168 weight management. We conducted FGDs in a private space at a community building. The  
31  
32 169 group size varied from 3 to 7. FGD participants were offered a light snack for their time and  
33  
34 170 participation.

35  
36  
37  
38  
39  
40 171 The investigator (SA) conducted IDIs with HCPs in the private room at their respective  
41  
42 172 health care centers. Informed consent was received before each interview. The IDIs were  
43  
44 173 conducted to understand the burden of obesity in the community, providers' perspectives on  
45  
46 174 the community's knowledge and attitude on obesity, and providers' related barriers to obesity  
47  
48 175 management. The questions included 'What percentage of patients attending to your  
49  
50 176 institution are overweight or obese?', 'In general, how well do you think patients understand  
51  
52 177 overweight and obesity?', 'How do community members view/perceive obesity?', 'Are there  
53  
54 178 any common misconceptions in the community about obesity?', and 'What factors affect  
55  
56  
57  
58  
59  
60

1  
2  
3 179 obesity management?' The moderator further probed on the above questions to explore  
4  
5 180 further information.  
6  
7

### 8 181 **Data analysis**

9  
10  
11 182 FGDs and IDIs were recorded and transcribed verbatim in Nepali. SS transcribed all recorded  
12  
13 183 data. Data were analysed using the hybrid thematic analysis approach.[21] We started with an  
14  
15 184 “a priori” list of codes drawn from the literature review and research questions and included  
16  
17 185 additional codes that emerged during the inductive analysis process.[22] One FGD and two  
18  
19 186 interview transcripts were coded separately by two independent coders (SS and SA) to  
20  
21 187 enhance the data validity. Coders discussed similarities and differences in the way codes were  
22  
23 188 applied and agreed on the emerging codes. The interconnected codes were then grouped into  
24  
25 189 sub-groups and sub-groups were further grouped into broad themes. After the discussion, the  
26  
27 190 final codebook was updated. SS further analysed the transcripts and grouped text units as per  
28  
29 191 the codes using the Atlas ti.7. Selected quotes were reported.  
30  
31  
32  
33  
34

### 35 192 **Ethics statement**

36  
37  
38 193 All participants who gave verbal consent to participate in the study also signed an informed  
39  
40 194 consent form. Participation in the study was voluntary. All collected data were kept safe and  
41  
42 195 strictly confidential.  
43  
44

### 45 196 **Patient and public involvement**

46  
47  
48 197 The study design and objectives were informed by previous findings from the DHS study,  
49  
50 198 which indicated the high prevalence of obesity and poor cardiovascular health literacy among  
51  
52 199 the community members. Although we did not specifically do separate community  
53  
54 200 engagement for this study, we did include the discussions in the planning of the DHS in  
55  
56 201 several community activities at schools, wards, meetings with female community health  
57  
58 202 volunteers, and other local community clubs.  
59  
60

1  
2  
3 203 **RESULTS**

4  
5 204 **Characteristics of participants**

6  
7 205 The characteristics of the FGD participants are presented in table 1.

8  
9  
10 206 **Table 1: Socio-demographic characteristics of FGD participants**

| Characteristics         | Participants (n=22)<br>n (%) |
|-------------------------|------------------------------|
| <b>Age group</b>        |                              |
| 20-39                   | 10 (45.5)                    |
| 40-59                   | 10 (45.5)                    |
| >60                     | 2 (9.0)                      |
| <b>Gender</b>           |                              |
| Male                    | 10 (45.5)                    |
| Female                  | 12 (54.5)                    |
| <b>Ethnicity</b>        |                              |
| Newar                   | 25 (71.4)                    |
| Brahmin                 | 5 (14.3)                     |
| Tamang                  | 4 (11.4)                     |
| <b>Marital status</b>   |                              |
| Married                 | 15 (68.2)                    |
| Not married             | 6 (27.3)                     |
| Widow                   | 1 (4.5)                      |
| <b>Education</b>        |                              |
| No formal education     | 3 (13.6)                     |
| Primary level education | 2 (9.1)                      |
| Secondary level         | 6 (27.3)                     |
| High school or more     | 9 (40.9)                     |
| <b>Occupation</b>       |                              |
| Employed                | 3 (13.6)                     |
| Self-employed*          | 9 (40.9)                     |
| Homemakers              | 4 (18.2)                     |
| Unemployed              | 2 (9.1)                      |
| Student                 | 4 (18.2)                     |
| <b>BMI</b>              |                              |
| <25kg/m <sup>2</sup>    | 9 (40.9%)                    |
| ≥25-29kg/m <sup>2</sup> | 6 (27.3%)                    |
| ≥30kg/m <sup>2</sup>    | 7 (31.8%)                    |

11  
12  
13  
14  
15  
16  
17  
18  
19  
20  
21  
22  
23  
24  
25  
26  
27  
28  
29  
30  
31  
32  
33  
34  
35  
36  
37  
38  
39  
40  
41  
42  
43  
44  
45  
46  
47  
48  
49  
50 207 \*Self-employed includes business and agriculture

51  
52 208 We categorized themes derived from FGDs and IDIs into five categories: (1) Burden of  
53  
54 209 obesity; (2) Knowledge of obesity; (3) Attitude towards obesity; (4) Body size perception;  
55  
56 210 and, (5) Barriers to obesity management. The example of coding, categorizing, and  
57  
58  
59 211 formulating themes is given in table 2.  
60

212

**Table 2: Example of coding, categorizing, and formulating themes**

| <b>Codes</b>                   | <b>Definition of codes</b>                                                                                                      | <b>Sub-category</b> | <b>Category</b>                      | <b>Theme</b>                  |
|--------------------------------|---------------------------------------------------------------------------------------------------------------------------------|---------------------|--------------------------------------|-------------------------------|
| Busy Schedule                  | Any reference to discontinuing or not initiating exercise due to the patient's lack of time.                                    | Exercise habit      | Challenges in behaviour modification | Barriers to weight management |
| Laziness                       | Any reference to discontinuing or not initiating exercise due to the patient's laziness.                                        |                     |                                      |                               |
| Co-morbidities                 | Any reference to discontinuing or not initiating exercise due to the patient's existing disease/condition.                      |                     |                                      |                               |
| Weather                        | Any reference to discontinuing or not initiating exercise due to weather conditions.                                            |                     |                                      |                               |
| Lack of physical facilities    | Any reference to discontinuing or not initiating exercise due to lack of physical facilities and/or adequate space to exercise. |                     |                                      |                               |
| Food taste                     | Any reference to the difficulty in modifying dietary habits due to food taste.                                                  | Food habit          |                                      |                               |
| Desire to eat                  | Any reference to the difficulty in modifying dietary habits due to the patient's desire to eat what they see.                   |                     |                                      |                               |
| Junk food                      | Any reference to the difficulty in modifying dietary habits due to easy availability and accessibility of junk food.            |                     |                                      |                               |
| Lack of access to healthy food | Any reference to the difficulty in modifying dietary habits due to the inaccessibility of healthy food.                         |                     |                                      |                               |

213

## 214 **Burden of obesity**

215 Both FGD participants and HCPs identified obesity as a growing problem in the community.

216 A medical officer stated that among the 20-25 patients he examines in a day, 7-8 of them are

217 either overweight or obese. He further commented that while obesity might be increasing

218 among teenagers, these teenagers are not under their radar as they seldom visit doctors.

219 Obesity was found to be higher among females and individuals aged 40 years and over in the

220 community. Participants also pointed out that obesity is high among particular ethnic groups,

221 such as Newar and Tamang, and among other sub-groups such as married persons, office

222 workers, housewives, businessmen, drivers, rich people, and people living in urban areas.

223 *“In Newari culture, there are a lot of feasts and festivals, so they eat a lot.*

224 *In the case of Tamang, they drink (alcohol) a lot. They eat much while*

225 *drinking. Both are high in calories, so this might result in weight gain.”*

226 (Nutritionist)

227

## 228 **Awareness of obesity**

### 229 Causes of obesity

230 All FGD participants believed that obesity could result from an unhealthy diet (e.g., oily and

231 fatty food), lack of exercise, and sedentary lifestyles. Few mentioned heredity or old age as

232 causes of overweight. Participants aged 40 and over reported they gained weight without any

233 specific reasons while maintaining their diet.

234 *“In my case, I eat chapatti in the evening and rice in the morning. Still, my*

235 *belly does not get decreased. In the past, despite my massive eating, I did*

236 *not gain weight. Now, even drinking water leads to weight gain.”*(Male,

237 above 40)

238 *“For some, it looks like genetics. Their grandparents are fat and so are the*

239 *grandchildren.”* (Female, above 40)

240 Female participants further added the reasons for being obese, such as the use of family

241 planning devices, an increase in food intake after childbirth, and the habit of eating leftovers

242 to prevent food waste.

1  
2  
3 243 *“(I) was told to eat more during my childbirth. Everyone used to say that I*  
4 244 *need more than before. So, the amount of my food increased. I used to eat*  
5 245 *less before (giggles)” (Female, above 40yrs.)*

7  
8 246 *“It’s like, someone leaves the food, and instead of throwing, I feel like [I]*  
9 247 *should eat it. Why throw (food)? So, I gained weight.” (Female, above*  
10 248 *40yrs.)*

### 12 249 Complications of obesity

14 250 Musculoskeletal problems, such as difficulty sitting and walking, back pain, and pressure on  
15  
16 251 the heel due to overweight were the predominant complications reported by participants.  
17  
18 252 Many also reported high blood pressures, while few mentioned diabetes, high cholesterol,  
19  
20 253 and heart disease as complications. Participants’ knowledge of complications was not only  
21  
22 254 based on their experience but also on what they had seen in their family and community.  
23  
24 255 Participants who had overweight were more concerned about complications, in terms of both  
25  
26 256 their health and appearance, than those with a normal weight. Male participants under the age  
27  
28 257 of 40 years were more concerned about their health and appearance due to overweight. One  
29  
30 258 overweight male participant under 40 years stated he was ashamed of walking with his  
31  
32 259 friends, and added:

33  
34  
35  
36  
37  
38 260 *“As per my experience, it is better to lose weight than to gain it. [...] Once*  
39 261 *I had an experience of being overweight. It was difficult. It’s like I had*  
40 262 *Asthma [disease]. I could not walk.” (Male, under 40yrs.)*

41  
42 263 *“Our body shape looks bad. [...] (We) look older at a younger age because*  
43 264 *of obesity. (Male, under 40yrs.)*

44  
45  
46 265 HCPs, however, commented that people do not take obesity seriously because they lack  
47  
48 266 adequate knowledge about its complications. Once HCP said:

49  
50 267 *“Until and unless the disease does not get complicated, it barely comes*  
51 268 *to their mind that they should go for a check-up. Otherwise, they don’t*  
52 269 *even give a try to reduce weight although they are asked to do so.”*  
53 270 *(Medical Officer)*

54 271



1  
2  
3 272 Participants who feared the health consequences of obesity usually ask the HPs for  
4  
5 273 suggestions to reduce weight. However, one HCP emphasized that the reason for being  
6  
7 274 concerned is the appearance rather than disease.

9  
10 275  
11 276 *“I see these days that people are concerned with obesity not because of*  
12 277 *disease but because of how they look physically. There are very few*  
13 278 *who [are] concerned about disease.” (Medical Officer)*

### 14 279 15 280 **Attitude towards obesity and overweight**

16  
17 281 FGD participants reported that overweight was considered good in society, both health-wise  
18  
19 282 and appearance-wise. Some participants under 40 years also expressed their willingness to  
20  
21 283 increase weight. One female participant described how odd it was to have a thin figure in her  
22  
23 284 family:

24  
25  
26  
27 285 *“...we are five daughters-in-law in the family...it looks odd when there is*  
28 286 *one thin person in the room...it does not match in the family.” (Female,*  
29 287 *under 40yrs.)*

30  
31  
32 288 For women, gaining weight after marriage was viewed positively.

33  
34  
35 289 *“If I lose my weight and visit there [maternal home], they [neighbors]*  
36 290 *would say that my husband did not provide me enough to eat [giggles]. If I*  
37 291 *go with my increased weight, they will say that my husband loves me.”*  
38 292 *(Female, under 40yrs.)*

39  
40 293 However, participants also believed that too much weight gain (obesity) was perceived as bad  
41  
42 294 in the community and that community perception/attitude towards obesity has been changing.  
43  
44 295 Participants attributed this change to the information provided through media, such as  
45  
46 296 television and radio, and to increasing obesity-related disease prevalence in the community.

47  
48  
49  
50 297 *“...My mother-in-law used to say that if she saw any handsome and healthy*  
51 298 *person then she thought that the person belongs to high economic class.*  
52 299 *[...] She says it is good. However, nowadays, her view has changed. Now*  
53 300 *she says that it is not good to gain weight, and excess weight results in*  
54 301 *disease. (Female, under 40yrs.)*

55  
56  
57 302 Most participants expressed a positive attitude towards thinness and expressed their  
58  
59 303 willingness to lose weight. Those who had already faced problems or are currently facing



1  
2  
3 304 problems due to obesity/overweight, both disease-and appearance-wise, did not want to  
4  
5 305 increase their weight despite comments from their family and.  
6  
7

8 306 *“If we, the overweight people, lose weight, we get comments (from others)*  
9 307 *like- what happened, what disease you suffered from, are you stressed, and*  
10 308 *all. But we have to take care of our own body although people comment.”*  
11 309 (Female, above 40yrs.)  
12  
13

14 310 HCPs also mentioned the low self-esteem and psychological stress they found among obese  
15  
16 311 people, especially in teenagers, because of negative comments that people make about them.  
17

18 312 *“It’s like okay if someone [obese individuals] can take it easy when they*  
19 313 *are called fat [“Mote”]. Otherwise, what I also have seen among teenagers*  
20 314 *age 16-17 years is that they do not participate in dance [competitions].*  
21 315 *They do not participate in game competitions because they think people*  
22 316 *will stare at them and flatter them. Such cases come often. (Nutritionist)*  
23 317  
24  
25

26 318 HCPs commented that though excessive weight (obesity) and thinness are considered bad in  
27  
28 319 the community, overweight is still considered good. This concept is hard to change among  
29  
30 320 people, even in educated people when it comes to children. The provider described saying,  
31  
32  
33

34 321 *“(I have seen) a woman with a lean child. She cried after seeing another*  
35 322 *chubby baby by her side grieving what had happened to her children.*  
36 323 *That was a difficult time for me [to counsel her].” (Nutritionist)*  
37 324  
38

### 39 325 **Body size perception**

40  
41 326 Before carrying out the discussion, we measured the height and weight of each FGD  
42  
43 327 participant. All participants aged 40 and above were found to be either obese or overweight.  
44  
45 328 Nevertheless, when asked what they feel about body size, the majority of them perceived that  
46  
47 329 their weight was normal.  
48  
49

50  
51 330 *“It would be good if I could decrease my belly size. Otherwise, I feel like I*  
52 331 *am normal.” (Male, under 40yrs.)*  
53

54 332 The majority of participants under 40 years had normal weight. Two participants, one male  
55  
56 333 and one female, considered themselves overweight although their measurement indicated  
57  
58 334 normal weight.  
59  
60

1  
2  
3 335 Most participants perceived their body size and weight by measuring their clothes' size,  
4  
5 336 evaluating themselves in mirrors, and experiencing others' comments about their body, while  
6  
7  
8 337 only a few male participants reported measuring their weight on a scale, when possible.  
9  
10 338 However, HCPs reported that the number of people who are aware of and/or interested in  
11  
12 339 measuring their weight is increasing in the community. As one said,

15 340 *"If we remember those people who measured their weight, the count will be double*  
16 341 *than our patients."* (Auxiliary Health Worker)

## 18 342 **Barriers to weight management**

### 20 343 **Challenges in behaviour modification**

#### 22 344 *Physical activity*

23  
24  
25 345 All FGD participants mentioned that diet modification and exercise are keys to prevent and  
26  
27  
28 346 control obesity. However, only a few of the participants reported exercising to maintain or  
29  
30 347 reduce their weight. Both overweight or obese and normal-weight participants reported  
31  
32 348 similar barriers to weight management. The most commonly reported barriers were busy  
33  
34 349 schedule and laziness followed by cold weather and lack of space or physical facilities for  
35  
36 350 exercise. Participants above 40 years of age reported that comorbidities such as  
37  
38 351 musculoskeletal pain limits their level of physical activity.  
39  
40 352

41 353 *"I cannot go [for exercise]. Otherwise, I want to walk. It is difficult for me*  
42 354 *to walk, my leg aches".* (Female, above 40yrs.)

43  
44 355 *"I don't have friends to walk together with. Here is no place for Yoga. [...].*  
45 356 *I also need to manage time at home"* (Female, under 40yrs.)

46  
47  
48 357 Two female participants under 40 years of age reported that they feel normal, and thus do not  
49  
50 358 feel a need to exercise.

51  
52  
53 359 *"We will exercise if we need to. Otherwise, it (the life) is going on. So, I*  
54 360 *feel- why should I exercise?"* (Female, under 40yrs.)

1  
2  
3 361 Participants had a diverse opinion on the adequate level of physical activity. A Few believed  
4  
5 362 that household chores like cooking and washing clothes were adequate for exercise, while  
6  
7 363 others thought that exercise was only adequate when they sweat. Participants' required  
8  
9  
10 364 duration of exercise ranged from 10 minutes to 3 hours a day.  
11  
12

### 13 365 *Effect of challenging food environment and diet behaviour*

14  
15  
16 366 The most frequently reported barrier for diet control was difficulty in changing food habits  
17  
18 367 due to food taste and desire to eat. Participants also mentioned the unavailability of healthy  
19  
20 368 food due to the use of excessive pesticides in vegetables and fruits. In addition, participants'  
21  
22 369 reported that the increased availability and efficiency of consuming junk food has limited  
23  
24 370 their consumption of healthier food. Consuming junk food was also a status symbol. One  
25  
26 371 participant explained that people in the community eat junk food to show that they belong to  
27  
28 372 a higher social status.  
29  
30  
31

32  
33 373 *"If our children walk taking the juice bottles and drinking juices, then that*  
34 374 *reflects a higher status. But, if they walk eating homemade popcorn, then*  
35 375 *that reflects the lower status. (Male, under 40yrs.)*  
36

### 37 376 Lack of HCP's knowledge and anthropometric measurement tools

38  
39  
40 377 HCPs reported that overweight and obesity were identified by measuring a patient's weight  
41  
42 378 and height, by observation, and by the patient's complaint. When asked specifically about  
43  
44 379 measuring central obesity, the HCPs at the tertiary level stated that they measure waist  
45  
46 380 circumference only for those who are diabetic or have a metabolic syndrome. However, the  
47  
48 381 HCPs at the peripheral level were not aware of measuring central obesity. One put it this  
49  
50 382 way-  
51  
52  
53

54 383 *"We have not done that (measured central obesity). We do not have an*  
55 384 *instrument. We also do not have such information. If we were given an*  
56 385 *instrument and the District Health Office directed us to do so or if we*  
57 386 *were given any training...we do everything based on our knowledge. We*  
58 387 *do not have anything extra."* (Auxiliary Health Worker)  
59 388  
60

### 389 Lack of counseling

390  
391 HCPs at the peripheral level counsel to patients for 7 mins to half an hour  
392  
393 depending upon the patient's condition and the provider's available time. At the tertiary level,  
394 the Nutritionist spends around half an hour to 45 minutes in counseling. However, the  
395 medical officer at the tertiary level could only provide a maximum of 5 minutes for  
396 counseling because of their time constraints and high daily patient volume. The medical  
397 officer mentioned that it would be helpful if they had additional assistance.

398  
399 *“Yes, I think it's a time factor (for not counseling patients). And another, I*  
400 *think it is helpful if we get a helping hand. One will take a note when one*  
401 *measure (weight), it expedites the process.” (Medical Officer)*  
402

### 403 **Discussion**

404 This study explored the perception of obesity and overweight among Nepalese adults living  
405 in a suburban community. We found that participants had inadequate knowledge and  
406 misconceptions regarding obesity and had perceived overweight as normal, healthy, and  
407 attractive. The adults above 40 years of age did not perceive themselves to be overweight or  
408 obese even when they were. Only a few participants reported exercising and controlling their  
409 diet to prevent obesity or manage their weight.

410 Obesity was perceived as a growing problem in the Dhulikhel community. A 2016 cross-  
411 sectional study by Shrestha et. al reported the prevalence of overweight and obesity among  
412 DHS participants of 18 years and older were as 28.4% and 8.1%, respectively.[9] Similarly,  
413 the nationally conducted WHO STEPS survey in 2019 reported the prevalence of overweight  
414 and obesity among Nepalese adults aged 15-45 years as 20% and 4.3%, respectively.[6] In  
415 our study, participants reported that obesity was mainly a problem among individuals who are  
416 40 years of age and above, married persons, office workers, businessmen, retired individuals,  
417 and housewives. A 2011 study among civil servants in Nepal reported that married

1  
2  
3 418 participants were 7.5 times more likely to be overweight/obese than non-married.[18]  
4

5 419 Additionally, the occupation was found to be related to being overweight/obese. Based on the  
6

7  
8 420 above findings, it is important to design interventional programmes targeting these  
9

10 421 populations to prevent overweight and obesity.  
11

12  
13 422 Participants mainly linked the causes of obesity to personal factors, such as fatty diet and  
14

15 423 physical inactivity, which is similar to other studies conducted in Nepal, India, Malaysia,  
16

17 424 South Africa, and Morocco.[8,17,18,23,24] Few of our participants reported heredity as a  
18

19 425 cause of obesity. This contrasts with the result from the previous study done among civil  
20

21 426 servants in Nepal, which found that an almost equal number of participants viewed “fatty  
22

23 427 foods” or “a genetic disorder” as a cause of obesity.[18] In addition to personal factors,  
24

25 428 women in our study stressed social and medical factors such as marriage, childbirth, the habit  
26

27 429 of eating left-overs, and the use of contraceptives as causes of obesity and overweight among  
28

29 430 females. In Nepalese society, gaining weight right after marriage is considered a good sign of  
30

31 431 a healthy relationship with a husband and in-laws. Culturally, Nepalese prefers to finish the  
32

33 432 food on the day that is cooked. As women are the last members of a household to eat, they  
34

35 433 are expected to consume all remaining food. Additionally, women’s increased food  
36

37 434 consumption after childbirth is believed to increase milk production and improved milk  
38

39 435 quality, and the well-being of both mother and child. Findings from the study conducted in  
40

41 436 the Laayoun community of Morocco also reported socio-cultural pressure as a factor for  
42

43 437 increasing weight among females.[16] In contrast to our study, this study reported that single  
44

45 438 females also desired to gain weight to maintain an ideal cultural beauty. It is important to  
46

47 439 educate females of reproductive age about obesity risks to promote a healthier lifestyle.  
48

49 440 Health and appearance are the key motives to lose weight.[25,26] Similar to findings from  
50

51 441 previous studies in South Africa and Morocco, participants in our study who were concerned  
52

53 442 about the consequences of obesity and their appearance were more willing to lose or  
54  
55  
56  
57  
58  
59  
60

1  
2  
3 443 maintain their current weight.[8,27] However, it is important to consider if people are only  
4  
5 444 concerned with their appearance because the weight loss for a transient period to appear fit  
6  
7 445 and attractive, such as in social events, will not be sustainable, and the attempt to lose a lot  
8  
9 446 of weight in a short duration of time can be hazardous.

11  
12 447 In our study, almost all participants who were 40 years and older underestimated their body  
13  
14 448 weight, though they all met the criteria of overweight and obese. This finding is similar to  
15  
16 449 studies conducted in Tanzania, Cameroon, and in the United States.[11,23,27] Additionally,  
17  
18 450 studies have also reported variation in weight estimation by gender and age.[8,28] A  
19  
20 451 qualitative study in South Africa reported that the majority of overweight and obese female  
21  
22 452 participants perceived themselves to be normal or moderately overweight, and chose the  
23  
24 453 silhouettes that were smaller than their body size.[8] A cross-sectional study in Morocco  
25  
26 454 reported that more females than males underestimated their body weight and males 40 years  
27  
28 455 of age and above were more likely to underestimate their weight compared to females in the  
29  
30 456 same age group.[27] Individuals who do not perceive themselves as overweight and obese are  
31  
32 457 likely to gain more weight due to their low-risk perception and unwillingness to lose  
33  
34 458 weight.[8,11,12] The inability for our participants to accurately recognize their body-weight  
35  
36 459 status may prevent them from adopting healthy behaviours and increase their risk to obesity  
37  
38 460 and its complications. Therefore, the community should be made aware of the importance of  
39  
40 461 measuring their weight at intervals, and health facilities should also increase educational  
41  
42 462 campaigns to improve community awareness.

43  
44 463 In Nepal, a big belly is culturally accepted as a sign of prosperity.[7,18] Participants'  
45  
46 464 perception that overweight is considered good, healthy, and attractive is consistent with other  
47  
48 465 studies conducted in South Africa, Morocco, and the United States.[8,23,27] Most strikingly,  
49  
50 466 this was frequently reported by females under 40 years of age. Research has shown that  
51  
52 467 females may be more accepting of obesity than men, and thus have a less negative attitude  
53  
54  
55  
56  
57  
58  
59  
60

1  
2  
3 468 towards obese individuals.[29] However, further studies on the role of gender in weight-  
4  
5 469 related acceptance are needed.  
6  
7

8 470 Although overweight is acceptable, participants have a negative attitude towards an obese  
9  
10 471 person. This reflects the finding of several other studies,[8,15,23,30] whereby obese  
11  
12 472 individuals are viewed as lazy, heavy, unattractive, and are perceived to have illnesses  
13  
14 473 associated with obesity. Studies have also shown the consequences of others' negative  
15  
16 474 attitudes among obese persons.[8,15,18,23,30] For example, a study in Cameroon reported  
17  
18 475 that overweight Caucasian and African American women were viewed differently and were  
19  
20 476 discriminated against despite their hard work.[23] Such internalized stigma among obese  
21  
22 477 individuals is particularly from the belief that obesity is a result of an individual's failure to  
23  
24 478 maintain a healthy lifestyle.[15] Considering the fact that participants in our study primarily  
25  
26 479 pointed out the internal factors such as diet and exercise, as causes of obesity, it is important  
27  
28 480 to make people aware of socio-cultural and medical factors to reduce obesity-related stigma  
29  
30 481 and negative attitude.[15] Further studies to explore the impact of negative attitudes on  
31  
32 482 overweight or obese individuals in Nepal would be beneficial to develop interventional  
33  
34 483 programmes in this setting.  
35  
36  
37  
38  
39

40  
41 484 Adequate exercise and a healthy diet are keys to managing obesity and other chronic  
42  
43 485 diseases.[31] Although participants in our study were aware that a healthy lifestyle will  
44  
45 486 benefit them, they did not implement it. This difference in knowledge and practice has been  
46  
47 487 described in many studies.[8,32–34] This could be due to low awareness of obesity  
48  
49 488 complications. In our study, both the overweight and normal-weight participants reported  
50  
51 489 similar barriers to weight management. This could be because only a few participants in our  
52  
53 490 study reported exercising or controlling a diet to reduce or prevent obesity. Moreover,  
54  
55 491 participants who were overweight did not perceive themselves as overweight and did not feel  
56  
57 492 the need to change their behaviour. The cultural acceptance of overweight in Nepalese culture  
58  
59  
60



1  
2  
3 493 and the difficulties in modifying behaviour could be a challenge to implementing the  
4  
5 494 effective intervention programme in this setting.  
6  
7

8 495 The surrounding environment influences our food choices and eating behaviour.[35] Studies  
9  
10 496 have shown a positive relationship between easy access to fast food and its high  
11  
12 497 consumption, leading to obesity and other cardiovascular diseases.[36,37] Participants in our  
13  
14 498 study also reported the increased availability of junk food as a cause of obesity. Interestingly,  
15  
16 499 few participants in our study related junk food with a higher social status. This might be due  
17  
18 500 to the influence of appealing advertisements and the increasing adoption of western food,  
19  
20 501 such as fries and chips in Nepal. A study conducted among school children in urban Nepal  
21  
22 502 reported that children belonging to families with higher income were 1.7 times more likely to  
23  
24 503 consume junk food than those belonging to families with lower income.[38] Whereas, few  
25  
26 504 other studies on school children showed no relationship between family income and junk  
27  
28 505 food consumption.[39,40] In addition, a cross-sectional study conducted among the DHS  
29  
30 506 participants in 2016 reported no association between income status and fast food  
31  
32 507 consumption.[41] Therefore, further studies exploring the relationship between  
33  
34 508 socioeconomic status and junk food consumption are warranted in Nepal. In addition to junk  
35  
36 509 food, our study participants also reported the use of pesticides in food as a barrier to healthy  
37  
38 510 eating. In Nepal, pesticides are widely used in agriculture, especially in vegetable cropping.  
39  
40 511 The pesticides formulation and import increased by more than 6-fold between 1997/1998 and  
41  
42 512 2011/2012.[42] Kavrepalanchok, the district of Dhulikhel, is one of the highest pesticide user  
43  
44 513 districts in Nepal.[43] A study conducted among potato growers in kavrepalanchok reported  
45  
46 514 that approximately 94% of potato growers apply pesticides in potatoes.[44] A qualitative  
47  
48 515 study conducted among cafeteria managers in Dhulikhel Hospital reported the unavailability  
49  
50 516 of healthy food in a local market as an obstacle to consuming healthy food in cafeterias.[20]  
51  
52 517 Most of the studies in Nepal are so far concentrated on modifying individual behaviours to  
53  
54  
55  
56  
57  
58  
59  
60



1  
2  
3 518 prevent obesity. However, the above findings suggest that we need to direct our focus on the  
4  
5 519 broader level, addressing the challenges associated with the food environment.  
6  
7

8 520 As in other low and middle-income countries, obesity is primarily assessed based on BMI in  
9  
10 521 Nepal.[15,45,46] However, BMI cannot differentiate between weight because of excessive  
11  
12 522 muscle percentage and body fat proportions.[15] Studies have shown that people with normal  
13  
14 523 BMI are at risk of cardiovascular diseases because of central obesity.[15,45,46] The  
15  
16 524 prevalence of central obesity has been increasing among South Asians. A 2006 study in  
17  
18 525 Nepal reported a higher prevalence of central obesity than general obesity among the study  
19  
20 526 population in Dharan.[47] Similarly, a study in China reported that the prevalence of central  
21  
22 527 obesity among adults with BMI <25kg/m<sup>2</sup> increased by almost two-fold from 11.9% in 1993  
23  
24 528 to 21.1% in 2009.[46] If the study did not consider measuring WC for obesity, they would  
25  
26 529 have missed 65% of the cases. This highlights the importance of measuring WC to accurately  
27  
28 530 measure obesity in clinical settings.  
29  
30  
31  
32  
33

34 531 This study is the first qualitative study in Nepal that aimed to understand the perception of  
35  
36 532 obesity among adults in a sub-urban community from both community and healthcare  
37  
38 533 providers' perspectives. The use of open-ended questions provided insights into participants'  
39  
40 534 perspectives and lived experiences. However, several limitations exist. This study is  
41  
42 535 confined to the sub-urban area; therefore, the perception of urban and rural areas is  
43  
44 536 underrepresented. However, a qualitative study is intended to understand a phenomenon, and  
45  
46 537 not to analyse the relationship between variables.[33,48] All the FGD participants belonged  
47  
48 538 to the Hindu religion; therefore, the study could not explore the perception of individuals of  
49  
50 539 other religions. However, the majority of the population in this area are Hindu. Although few  
51  
52 540 numbers of health providers were interviewed in this study, we have considered to include  
53  
54 541 them from the different health care levels. Given these limitations, however, the study  
55  
56 542 provides profound information on the community's perception of obesity in Nepal.  
57  
58  
59  
60

## 543 **Conclusions**

544 This qualitative study explored the knowledge, attitude, and perception of obesity among  
545 Nepalese adults in a suburban community. Given the participants' misconception and  
546 inadequate knowledge regarding obesity, and the underestimation of their body size, it is  
547 suggested to design and disseminate culturally appropriate health information to manage  
548 obesity in the community. Also, it is essential to consider challenges associated with food  
549 environment while designing health intervention. Our finding shows that the healthcare  
550 providers at the peripheral health institutions lack training and instrument to measure central  
551 obesity. Since the prevalence of central obesity is rising in South Asians, including the  
552 Nepalese population, it is important to consider central obesity while training health workers  
553 at the peripheral level.

554

## 555 **List of abbreviations**

556 BMI: Body Mass Index

557 FGD: Focus Group Discussion

558 HCP: Healthcare Provider

559 IDI: In-depth Interview

560 STEPS: STEPwise approach to surveillance

561 WHO: World Health Organization

1  
2  
3 562 **Declarations**

4  
5 563 **Acknowledgments**

6  
7 564 This study was supported by grants from the Wide Open Vistas, United States. We  
8  
9  
10 565 acknowledge the support of Dhulikhel Hospital for allowing us to conduct this study. We also  
11  
12 566 thank all participants for providing their invaluable contribution to the study.  
13  
14

15 567 **Author contributions**

16  
17 568 SS, the principal investigator, conceived the study, transcribed and analysed data, and  
18  
19 569 developed the manuscript. BMK and RK contributed to the research design. SA contributed  
20  
21  
22 570 to collecting and analysing the data. SSu contributed to revising the manuscript. All authors  
23  
24 571 read and approved the final manuscript for publication.  
25  
26

27 572 **Funding**

28  
29 573 This work was supported by the Wide Open Vistas [grant number WOV-002].  
30  
31

32 574 **Competing interests**

33  
34 575 None declared  
35  
36

37 576 **Patient consent for publication**

38  
39 577 Not required.  
40  
41

42 578 **Ethics approval**

43  
44 579 Ethical approval was obtained from the Kathmandu University School of Medical Sciences  
45  
46 580 Institutional Review Committee (IRB# 36/16).  
47  
48  
49

50 581 **Provenance and peer review**

51  
52 582 Not commissioned, externally peer reviewed.  
53  
54  
55

56 583 **Data availability statement**

57  
58 584 No data are available.  
59  
60

585 **References**

- 586 1 World Health Organization. Global health risks : mortality and burden of disease  
587 attributable to selected major risks. Published Online First:  
588 2009. <https://apps.who.int/iris/handle/10665/44203>
- 589 2 Zalesin KC, Franklin BA, Miller. WM, *et al.* Impact of obesity on cardiovascular  
590 disease. *Medical Clinics of North America* 2011;**95**:919–37. doi:10.1016/j.mcna.2011.06.005
- 591 3 Colditz GA, Willett WC, Stampfer MJ, *et al.* Weight as a risk factor for clinical  
592 diabetes in women. *American journal of epidemiology* 1990;**132**:501–13.
- 593 4 Colditz GA, Willett WC, Rotnitzky A, *et al.* Weight gain as a risk factor for clinical  
594 diabetes mellitus in women. *Annals of internal medicine* 1995;**122**:481–6.
- 595 5 Yoon K-H, Lee J-H, Kim J-W, *et al.* Epidemic obesity and type 2 diabetes in Asia.  
596 *The Lancet* 2006;**368**:1681–8.
- 597 6 Dhimal M, Bista B, Bhattarai S, *et al.* Report of Non Communicable Disease Risk  
598 Factors: STEPS Survey Nepal 2019. Kathmandu: 2020.
- 599 7 Vaidya A, Shakya S, Krettek A. Obesity prevalence in Nepal: public health  
600 challenges in a low-income nation during an alarming worldwide trend. *Int J Environ Res*  
601 *Public Health* 2010;**7**:2726–44. doi:10.3390/ijerph7062726
- 602 8 Okop KJ, Mukumbang FC, Mathole T, *et al.* Perceptions of body size, obesity threat  
603 and the willingness to lose weight among black South African adults: a qualitative study.  
604 *BMC Public Health* 2016;**16**:365. doi:10.1186/s12889-016-3028-7
- 605 9 Shrestha A, Koju RP, Beresford SAA, *et al.* Reproducibility and relative validity of  
606 food group intake in a food frequency questionnaire developed for Nepalese diet. *Int J Food*  
607 *Sci Nutr* 2017;**68**:605–12. doi:10.1080/09637486.2016.1268099
- 608 10 Mishra SR, Neupane D, Bhandari PM, *et al.* Burgeoning burden of non-  
609 communicable diseases in Nepal: a scoping review. *Global Health* 2015;**11**:32.  
610 doi:10.1186/s12992-015-0119-7
- 611 11 Muhihi AJ, Njelekela MA, Mpembeni R, *et al.* Obesity, Overweight, and Perceptions  
612 about Body Weight among Middle-Aged Adults in Dar es Salaam, Tanzania. *ISRN Obes*  
613 2012;**2012**:368520. doi:10.5402/2012/368520
- 614 12 Awah PK, Kengne AP, Fezeu LL, *et al.* Perceived risk factors of cardiovascular  
615 diseases and diabetes in Cameroon. *Health Educ Res* 2008;**23**:612–20.  
616 doi:10.1093/her/cym037
- 617 13 Mellor D, Fuller-Tyszkiewicz M, McCabe MP, *et al.* Body image and self-esteem  
618 across age and gender: A short-term longitudinal study. *Sex roles* 2010;**63**:672–81.
- 619 14 Koju RP, Karmacharya BM, Shrestha A, *et al.* Design of the Dhulikhel Heart Study  
620 (DHS): The epidemiology of emerging cardiovascular disease in Nepal. *Annals of Global*  
621 *Health* 2014;**80**:204–5.

- 1  
2  
3 622 15 Sikorski C, Riedel C, Luppá M, *et al.* Perception of overweight and obesity from  
4 623 different angles: a qualitative study. *Scand J Public Health* 2012;**40**:271–7.  
5 624 doi:10.1177/1403494812443604
- 6  
7 625 16 Rguibi M, Belahsen R. Body size preferences and sociocultural influences on  
8 626 attitudes towards obesity among Moroccan Sahraoui women. *Body Image* 2006;**3**:395–400.  
9 627 doi:10.1016/j.bodyim.2006.07.007
- 10  
11  
12 628 17 Agrawal P, Gupta K, Mishra V, *et al.* A study on body-weight perception, future  
13 629 intention and weight-management behaviour among normal-weight, overweight and obese  
14 630 women in India. *Public health nutrition* 2014;**17**:884–95.
- 15  
16 631 18 Simkhada P, Poobalan A, Simkhada PP, *et al.* Knowledge, attitude, and prevalence of  
17 632 overweight and obesity among civil servants in Nepal. *Asia Pacific Journal of Public Health*  
18 633 2011;**23**:507–17.
- 19  
20  
21 634 19 Oli N, Vaidya A, Subedi M, *et al.* Diet and physical activity for children’s health: a  
22 635 qualitative study of Nepalese mothers’ perceptions. *BMJ open* 2015;**5**.
- 23  
24 636 20 Tamrakar D, Shrestha A, Rai A, *et al.* Drivers of healthy eating in a workplace in  
25 637 Nepal: a qualitative study. *BMJ Open* 2;**10**:e031404. doi:10.1136/bmjopen-2019-031404
- 26  
27 638 21 Swain J. *A hybrid approach to thematic analysis in qualitative research: Using a*  
28 639 *practical example*. SAGE Publications Ltd 2018.
- 29  
30 640 22 Braun V, Clarke V, Cooper H. APA handbook of research methods in psychology.  
31 641 *Cooper H, Thematic analysis* 2012;**2**.
- 32  
33 642 23 Blixen CE, Singh A, Thacker H. Values and beliefs about obesity and weight  
34 643 reduction among African American and Caucasian women. *J Transcult Nurs* 2006;**17**:290–7.  
35 644 doi:10.1177/1043659606288375
- 36  
37 645 24 Chang C, Chang K, WL CI-2. Adult’s perception of being overweight and obese: a  
38 646 focus group study. *Asia Pac J Clin Nutr* 2009;**18**:257-264 25.
- 39  
40  
41 647 25 Cheskin LJ, Donze LF. Appearance vs health as motivators for weight loss. *JAMA*  
42 648 2001;**286**:2160–2160.
- 43  
44 649 26 Teixeira PJ, Silva MN, Mata J, *et al.* Motivation, self-determination, and long-term  
45 650 weight control. *International Journal of Behavioral Nutrition and Physical Activity*  
46 651 2012;**9**:22.
- 47  
48 652 27 Lahmam A, Baali A, Hilali MK, *et al.* Obesity, overweight and body-weight  
49 653 perception in a High Atlas Moroccan population. *Obes Rev* 2008;**9**:93–9. doi:10.1111/j.1467-  
50 654 789X.2007.00413.x
- 51  
52  
53 655 28 Greener J, Douglas F, van Teijlingen E. More of the same? Conflicting perspectives  
54 656 of obesity causation and intervention amongst overweight people, health professionals and  
55 657 policy makers. *Social science & medicine* 2010;**70**:1042–9.
- 56  
57 658 29 Pantenburg B, Sikorski C, Luppá M, *et al.* Medical students’ attitudes towards  
58 659 overweight and obesity. *PLoS One* 2012;**7**:e48113.
- 59  
60

- 1  
2  
3 660 30 Cossrow NH, Jeffery RW, McGuire MT. Understanding weight stigmatization: a  
4 661 focus group study. *J Nutr Educ* 2001;**33**:208–14.
- 6 662 31 Ard JD, Svetkey LP. Diet and blood pressure: applying the evidence to clinical  
7 663 practice. *Am Heart J* 2005;**149**:804–12. doi:10.1016/j.ahj.2005.01.040
- 9 664 32 Risso-Gill I, Balabanova D, Majid F, *et al.* Understanding the modifiable health  
10 665 systems barriers to hypertension management in Malaysia: a multi-method health systems  
11 666 appraisal approach. *BMC Health Serv Res* 2015;**15**:254. doi:10.1186/s12913-015-0916-y
- 13 667 33 Mothiba T, Malema R, Lekhuleni M. The experiences of the newly diagnosed  
14 668 hypertensive patients admitted into tertiary hospital campus in Limpopo Province, South  
15 669 Africa. *African Journal for Physical, Health Education, Recreation and Dance (AJPHERD)*  
16 670 2013;:213–21.
- 19 671 34 Shrestha S, Shrestha A, Koju RP, *et al.* Barriers and facilitators to treatment among  
20 672 patients with newly diagnosed hypertension in Nepal. *Heart Asia* 2018;**10**.
- 22 673 35 Lake AA. Neighbourhood food environments: food choice, foodscapes and planning  
23 674 for health. *Proc Nutr Soc* 8;**77**:239–46. doi:10.1017/S0029665118000022
- 25 675 36 Mohammadbeigi A, Asgarian A, Moshir E, *et al.* Fast food consumption and  
26 676 overweight/obesity prevalence in students and its association with general and abdominal  
27 677 obesity. *Journal of preventive medicine and hygiene* 2018;**59**:E236.
- 29 678 37 Mistry SK, Puthussery S. Risk factors of overweight and obesity in childhood and  
30 679 adolescence in South Asian countries: a systematic review of the evidence. *Public Health*  
31 680 2015;**129**:200–9. doi:10.1016/j.puhe.2014.12.004
- 33 681 38 Karki A, Shrestha A, Subedi N. Prevalence and associated factors of childhood  
34 682 overweight/obesity among primary school children in urban Nepal. *BMC Public Health*  
35 683 2019;**19**:1055. doi:10.1186/s12889-019-7406-9
- 37 684 39 Poudel B, Tiraphat S, Hong SA. Factors associated with junk food consumption  
38 685 among urban school students in Kathmandu District of Nepal. *Journal of Public Health and*  
39 686 *Development* 2018;**16**:59–72.
- 41 687 40 Upreti YR, Bastien S, Bjonness B, *et al.* Socio-Ecological Factors Associated with  
42 688 Snacking Behaviors of Basic School Students in Nepal. *Current Research in Nutrition and*  
43 689 *Food Science Journal* 2020;**8**:774–84.
- 45 690 41 Shrestha A, Koju RP, Beresford SA, *et al.* Food patterns measured by principal  
46 691 component analysis and obesity in the Nepalese adult. *Heart Asia* 2016;**8**:46–53.  
47 692 doi:10.1136/heartasia-2015-010666
- 49 693 42 Sushma D, Dipesh R, Lekhendra T, *et al.* A review on status of pesticides use in  
50 694 Nepal. *Research Journal of Agriculture and Forestry Sciences ISSN* 2015;**2320**:6063.
- 52 695 43 YD G. Status of pesticide use in Nepal and future strategy for their safe and  
53 696 alternative uses. 2016.

- 1  
2  
3 697 44 Sapkota KR, Sapkota S, Sapkota S, *et al.* Pesticides handling practices among potato  
4 698 growers in Kavrepalanchok, Nepal. *Journal of Agriculture and Natural Resources*  
5 699 2020;**3**:77–87.  
6  
7 700 45 Poobalan A, Aucott L. Obesity Among Young Adults in Developing Countries: A  
8 701 Systematic Overview. *Curr Obes Rep* 2016;**5**:2–13. doi:10.1007/s13679-016-0187-x  
9  
10 702 46 Du T, Sun X, Yin P, *et al.* Increasing trends in central obesity among Chinese adults  
11 703 with normal body mass index, 1993–2009. *BMC public health* 2013;**13**:327.  
12  
13 704 47 Vaidya AK, Pokharel PK, Nagesh S, *et al.* Association of obesity and physical  
14 705 activity in adult males of Dharan, Nepal. 2006.  
15  
16 706 48 Shrestha S. Barriers and Facilitators to Treatment among Newly Diagnosed  
17 707 Hypertensive Patients in Nepal: a Qualitative Study. 2016.  
18  
19  
20 708  
21  
22  
23  
24  
25  
26  
27  
28  
29  
30  
31  
32  
33  
34  
35  
36  
37  
38  
39  
40  
41  
42  
43  
44  
45  
46  
47  
48  
49  
50  
51  
52  
53  
54  
55  
56  
57  
58  
59  
60



## Standards for Reporting Qualitative Research (SRQR)<sup>a</sup>

| No. | Topic                                                   | Item                                                                                                                                                                                                                                                                                                                                     | Page/<br>line<br>no(s). |
|-----|---------------------------------------------------------|------------------------------------------------------------------------------------------------------------------------------------------------------------------------------------------------------------------------------------------------------------------------------------------------------------------------------------------|-------------------------|
|     | <b>Title and abstract</b>                               |                                                                                                                                                                                                                                                                                                                                          |                         |
| S1  | Title                                                   | Concise description of the nature and topic of the study identifying the study as qualitative or indicating the approach (e.g., ethnography, grounded theory) or data collection methods (e.g., interview, focus group) is recommended                                                                                                   | 1                       |
| S2  | Abstract                                                | Summary of key elements of the study using the abstract format of the intended publication; typically includes objective, methods, results, and conclusions                                                                                                                                                                              | 2                       |
|     | <b>Introduction</b>                                     |                                                                                                                                                                                                                                                                                                                                          |                         |
| S3  | Problem formulation                                     | Description and significance of the problem/phenomenon studied; review of relevant theory and empirical work; problem statement                                                                                                                                                                                                          | 4                       |
| S4  | Purpose or research question                            | Purpose of the study and specific objectives or questions                                                                                                                                                                                                                                                                                | 4                       |
|     | <b>Methods</b>                                          |                                                                                                                                                                                                                                                                                                                                          |                         |
| S5  | Qualitative approach and research paradigm <sup>b</sup> | Qualitative approach (e.g., ethnography, grounded theory, case study, phenomenology, narrative research) and guiding theory if appropriate; identifying the research paradigm (e.g., positivist, constructivist/interpretivist) is also recommended                                                                                      | 5                       |
| S6  | Researcher characteristics and reflexivity              | Researchers' characteristics that may influence the research, including personal attributes, qualifications/experience, relationship with participants, assumptions, or presuppositions; potential or actual interaction between researchers' characteristics and the research questions, approach, methods, results, or transferability | 6                       |
| S7  | Context <sup>b</sup>                                    | Setting/site and salient contextual factors; rationale <sup>a</sup>                                                                                                                                                                                                                                                                      | 5                       |
| S8  | Sampling strategy <sup>b</sup>                          | How and why research participants, documents, or events were selected; criteria for deciding when no further sampling was necessary (e.g., sampling saturation); rationale <sup>a</sup>                                                                                                                                                  | 5                       |
| S9  | Ethical issues pertaining to human subjects             | Documentation of approval by an appropriate ethics review board and participant consent, or explanation for lack thereof; other confidentiality and data security issues                                                                                                                                                                 | 20                      |
| S10 | Data collection methods <sup>b</sup>                    | Types of data collected; details of data collection procedures including (as appropriate) start and stop dates of data collection and analysis, iterative process, triangulation of sources/methods, and modification of procedures in response to evolving study findings; rationale <sup>a</sup>                                       | 5-6                     |
| S11 | Data collection instruments and technologies            | Description of instruments (e.g., interview guides, questionnaires) and devices (e.g., audio recorders) used for data collection; if/how the instrument(s) changed over the course of the study                                                                                                                                          | 5-6                     |



|                         |                                                                                              |                                                                                                                                                                                                                                                                                                       |          |
|-------------------------|----------------------------------------------------------------------------------------------|-------------------------------------------------------------------------------------------------------------------------------------------------------------------------------------------------------------------------------------------------------------------------------------------------------|----------|
| S12                     | Units of study                                                                               | Number and relevant characteristics of participants, documents, or events included in the study; level of participation (could be reported in results)                                                                                                                                                | 5-6, 7-8 |
| S13                     | Data processing                                                                              | Methods for processing data prior to and during analysis, including transcription, data entry, data management and security, verification of data integrity, data coding, and anonymization/deidentification of excerpts                                                                              | 6        |
| S14                     | Data analysis <sup>b</sup>                                                                   | Process by which inferences, themes, etc., were identified and developed, including researchers involved in data analysis; usually references a specific paradigm or approach; rationale <sup>a</sup>                                                                                                 | 6,8-9    |
| S15                     | Techniques to enhance trustworthiness <sup>b</sup>                                           | Techniques to enhance trustworthiness and credibility of data analysis (e.g., member checking, audit trail, triangulation); rationale <sup>a</sup>                                                                                                                                                    | 6        |
| <b>Results/Findings</b> |                                                                                              |                                                                                                                                                                                                                                                                                                       |          |
| S16                     | Synthesis and interpretation                                                                 | Main findings (e.g., interpretations, inferences, and themes); might include development of a theory or model, or integration with prior research or theory                                                                                                                                           | 7-15     |
| S17                     | Links to empirical data                                                                      | Evidence (e.g., quotes, field notes, text excerpts, photographs) to substantiate analytic findings                                                                                                                                                                                                    | 9-15     |
| <b>Discussion</b>       |                                                                                              |                                                                                                                                                                                                                                                                                                       |          |
| S18                     | Integration with prior work, implications, transferability, and contribution(s) to the field | Short summary of main findings; explanation of how findings and conclusions connect to, support, elaborate on, or challenge conclusions of earlier scholarship; discussion of scope of application/generalizability; identification of unique contribution(s) to scholarship in a discipline or field | 15-18    |
| S19                     | Limitations                                                                                  | Trustworthiness and limitations of findings                                                                                                                                                                                                                                                           | 18       |
| <b>Other</b>            |                                                                                              |                                                                                                                                                                                                                                                                                                       |          |
| S20                     | Conflicts of interest                                                                        | Potential sources of influence or perceived influence on study conduct and conclusions; how these were managed                                                                                                                                                                                        | 20       |
| S21                     | Funding                                                                                      | Sources of funding and other support; role of funders in data collection, interpretation, and reporting                                                                                                                                                                                               | 19       |

<sup>a</sup>The authors created the SRQR by searching the literature to identify guidelines, reporting standards, and critical appraisal criteria for qualitative research; reviewing the reference lists of retrieved sources; and contacting experts to gain feedback. The SRQR aims to improve the transparency of all aspects of qualitative research by providing clear standards for reporting qualitative research.

<sup>b</sup>The rationale should briefly discuss the justification for choosing that theory, approach, method, or technique rather than other options available, the assumptions and limitations implicit in those choices, and how those choices influence study conclusions and transferability. As appropriate, the rationale for several items might be discussed together.

Reference: O'Brien BC, Harris IB, Beckman TJ, Reed DA, Cook DA. Standards for reporting qualitative research: a synthesis of recommendations. *Academic Medicine*, Vol. 89, No. 9 / Sept 2014 DOI: 10.1097/ACM.0000000000000388
